# Supplementary figures and images for: Separation of lattice-incorporated Cr(vi) from calcium carbonate by converting microcrystals into nanocrystals via the carbonation pathway based on the density functional theory study of incorporation energy
Source: Royal Society of Chemistry journal article supplement (doi:10.1039/d2en00040g), 2022-01-01

Intensity (a.u.)

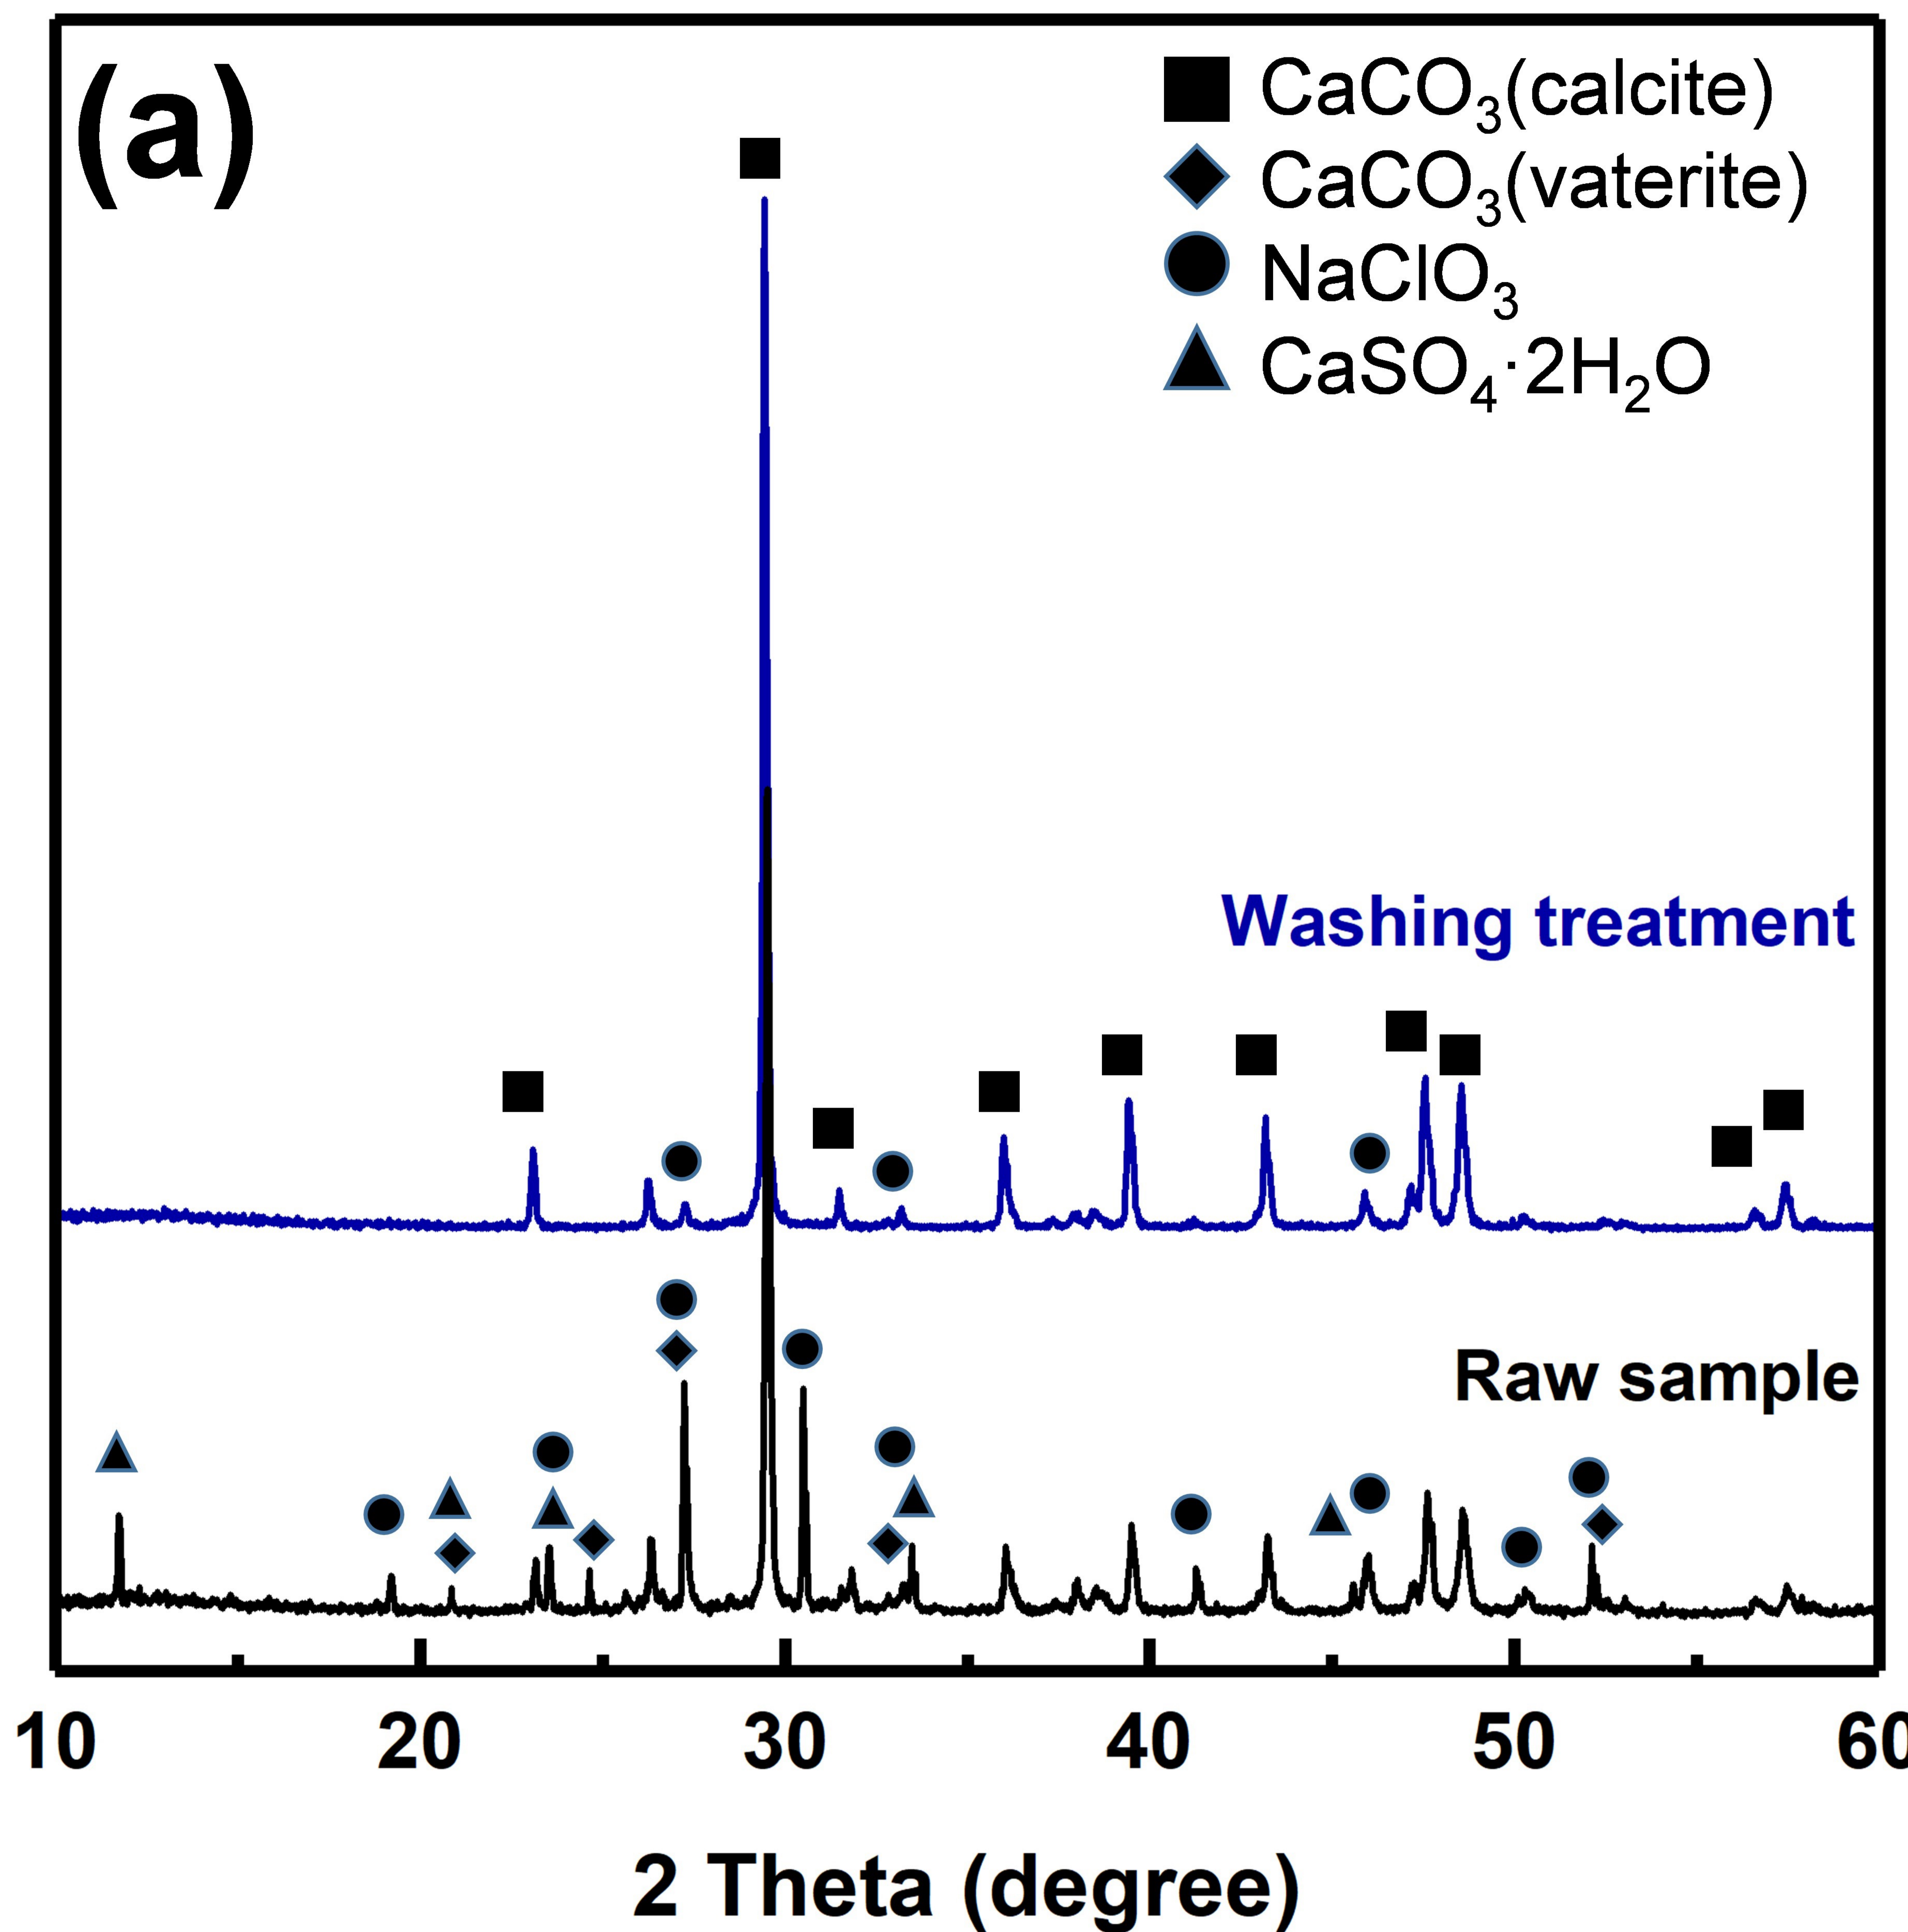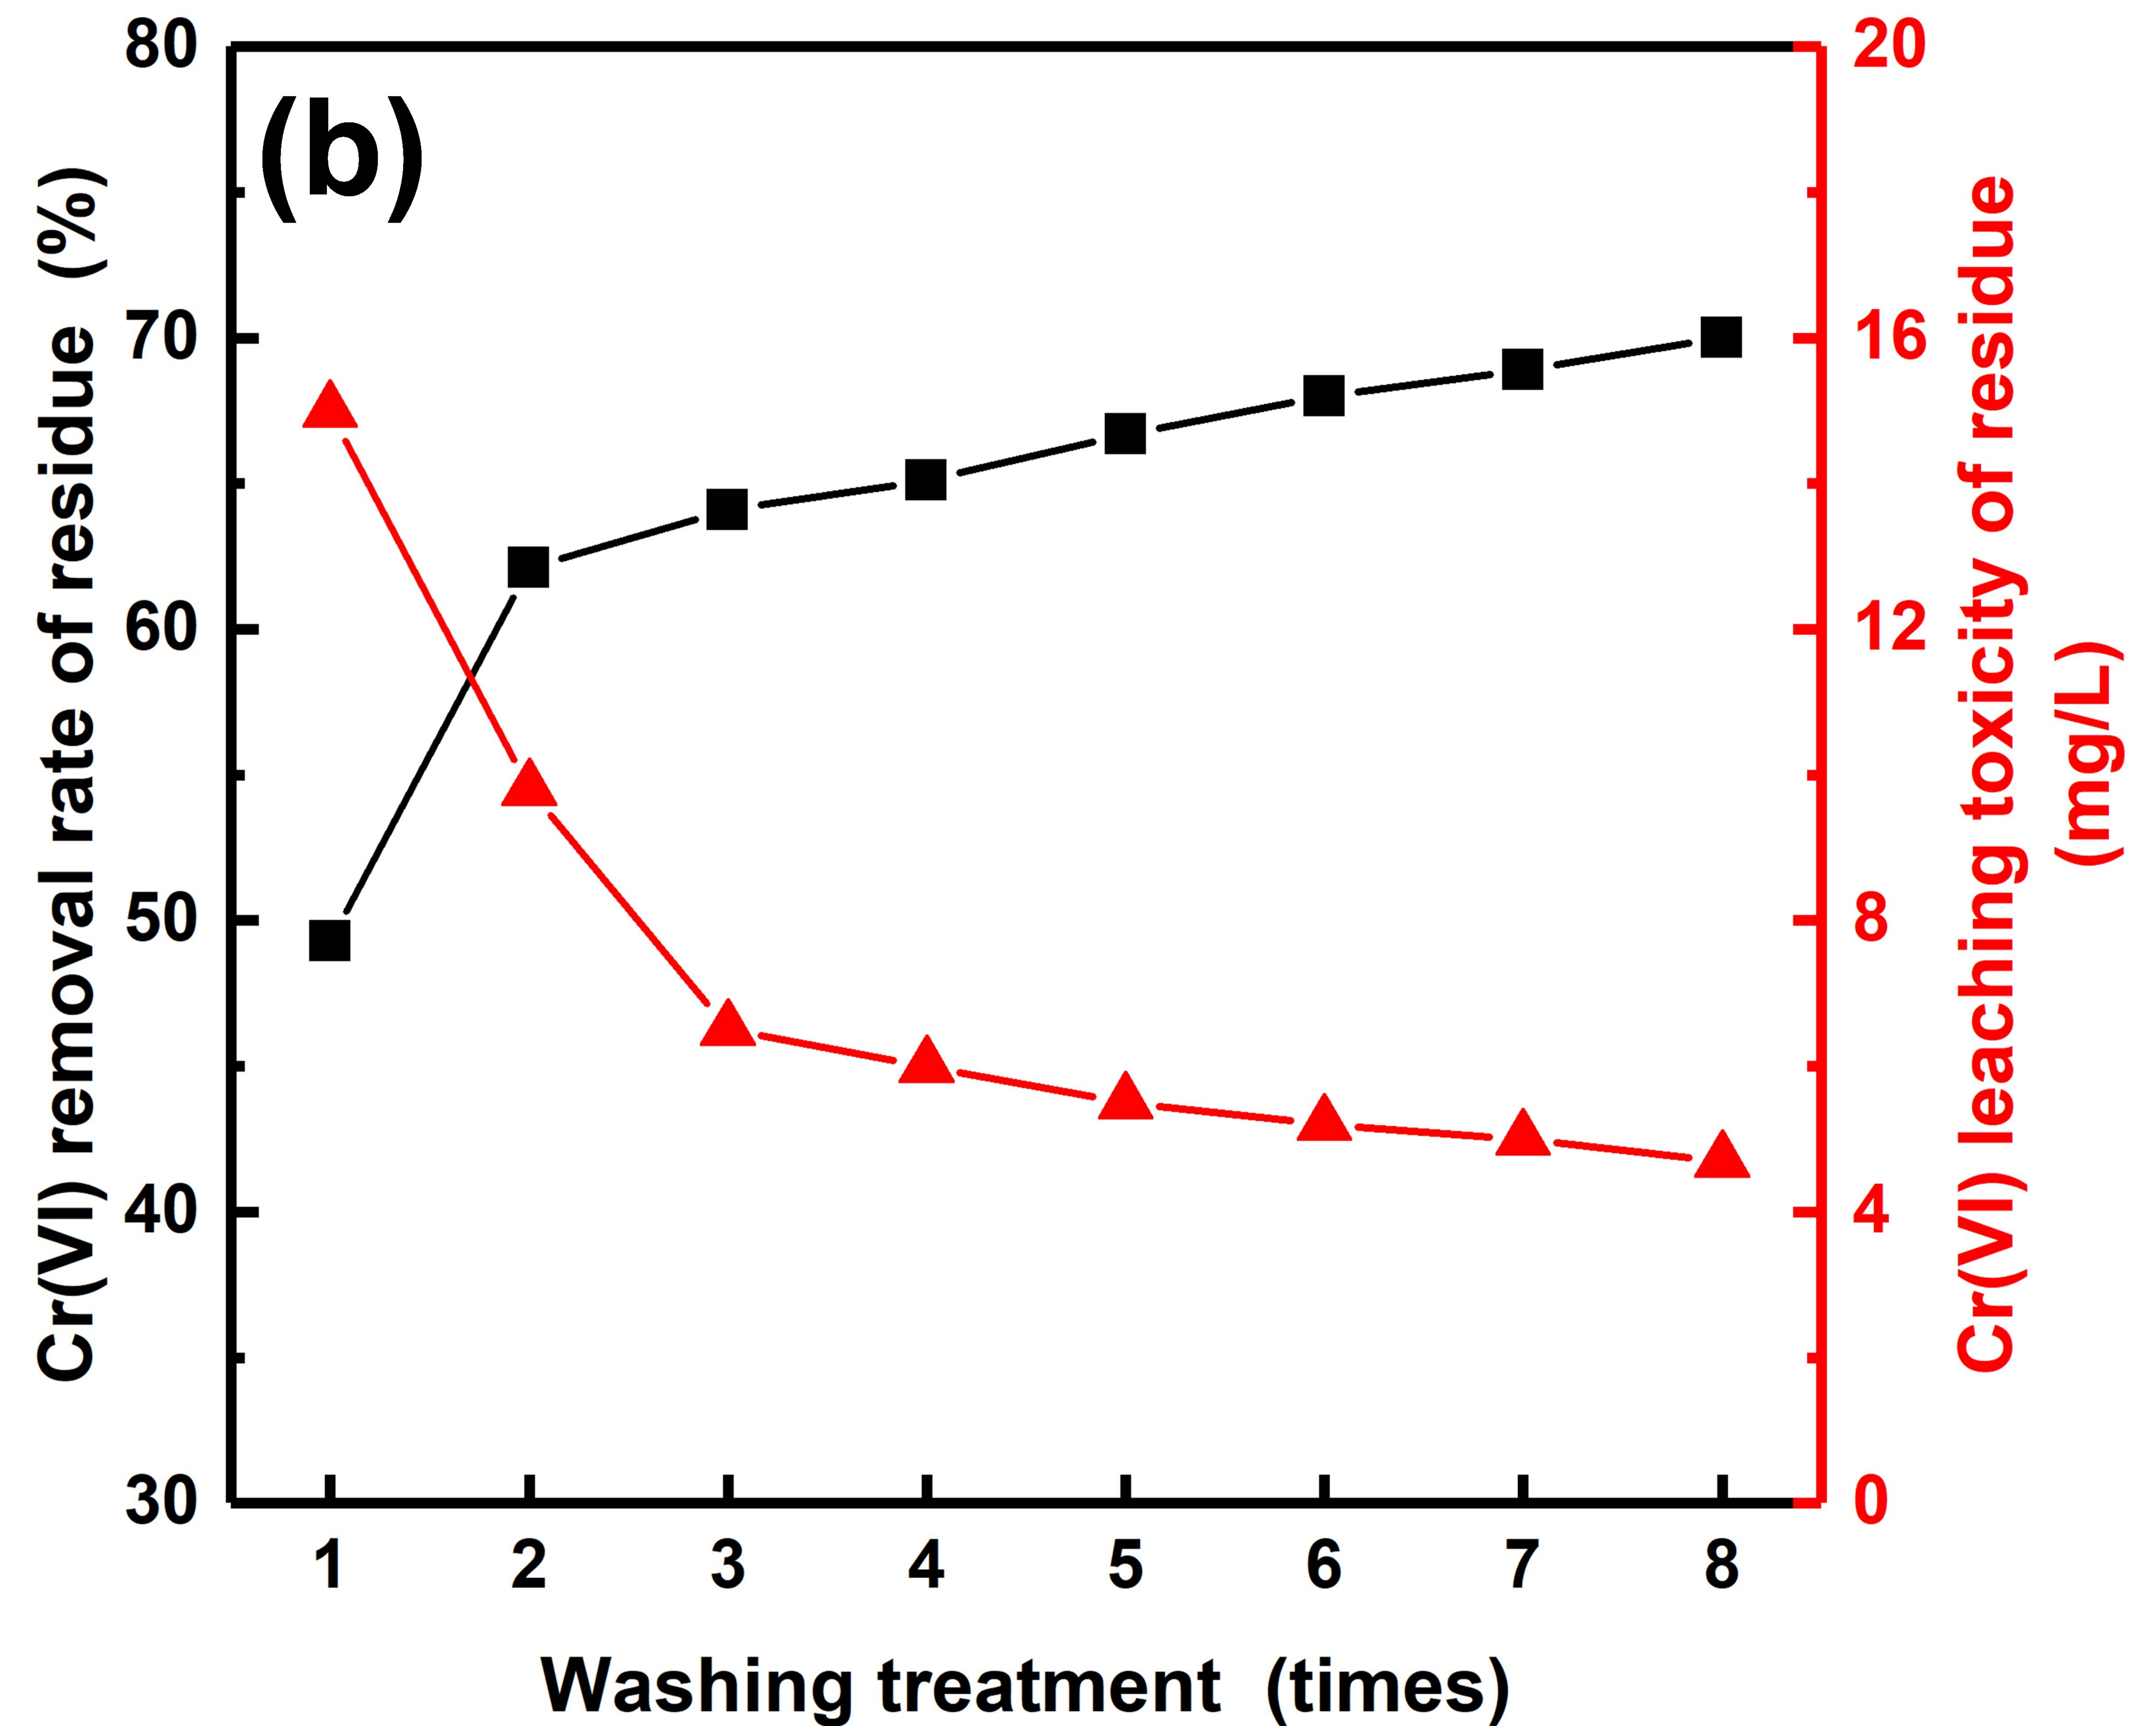

Supplement: d2en00040g2.pdf [file d2en00040g2.pdf]

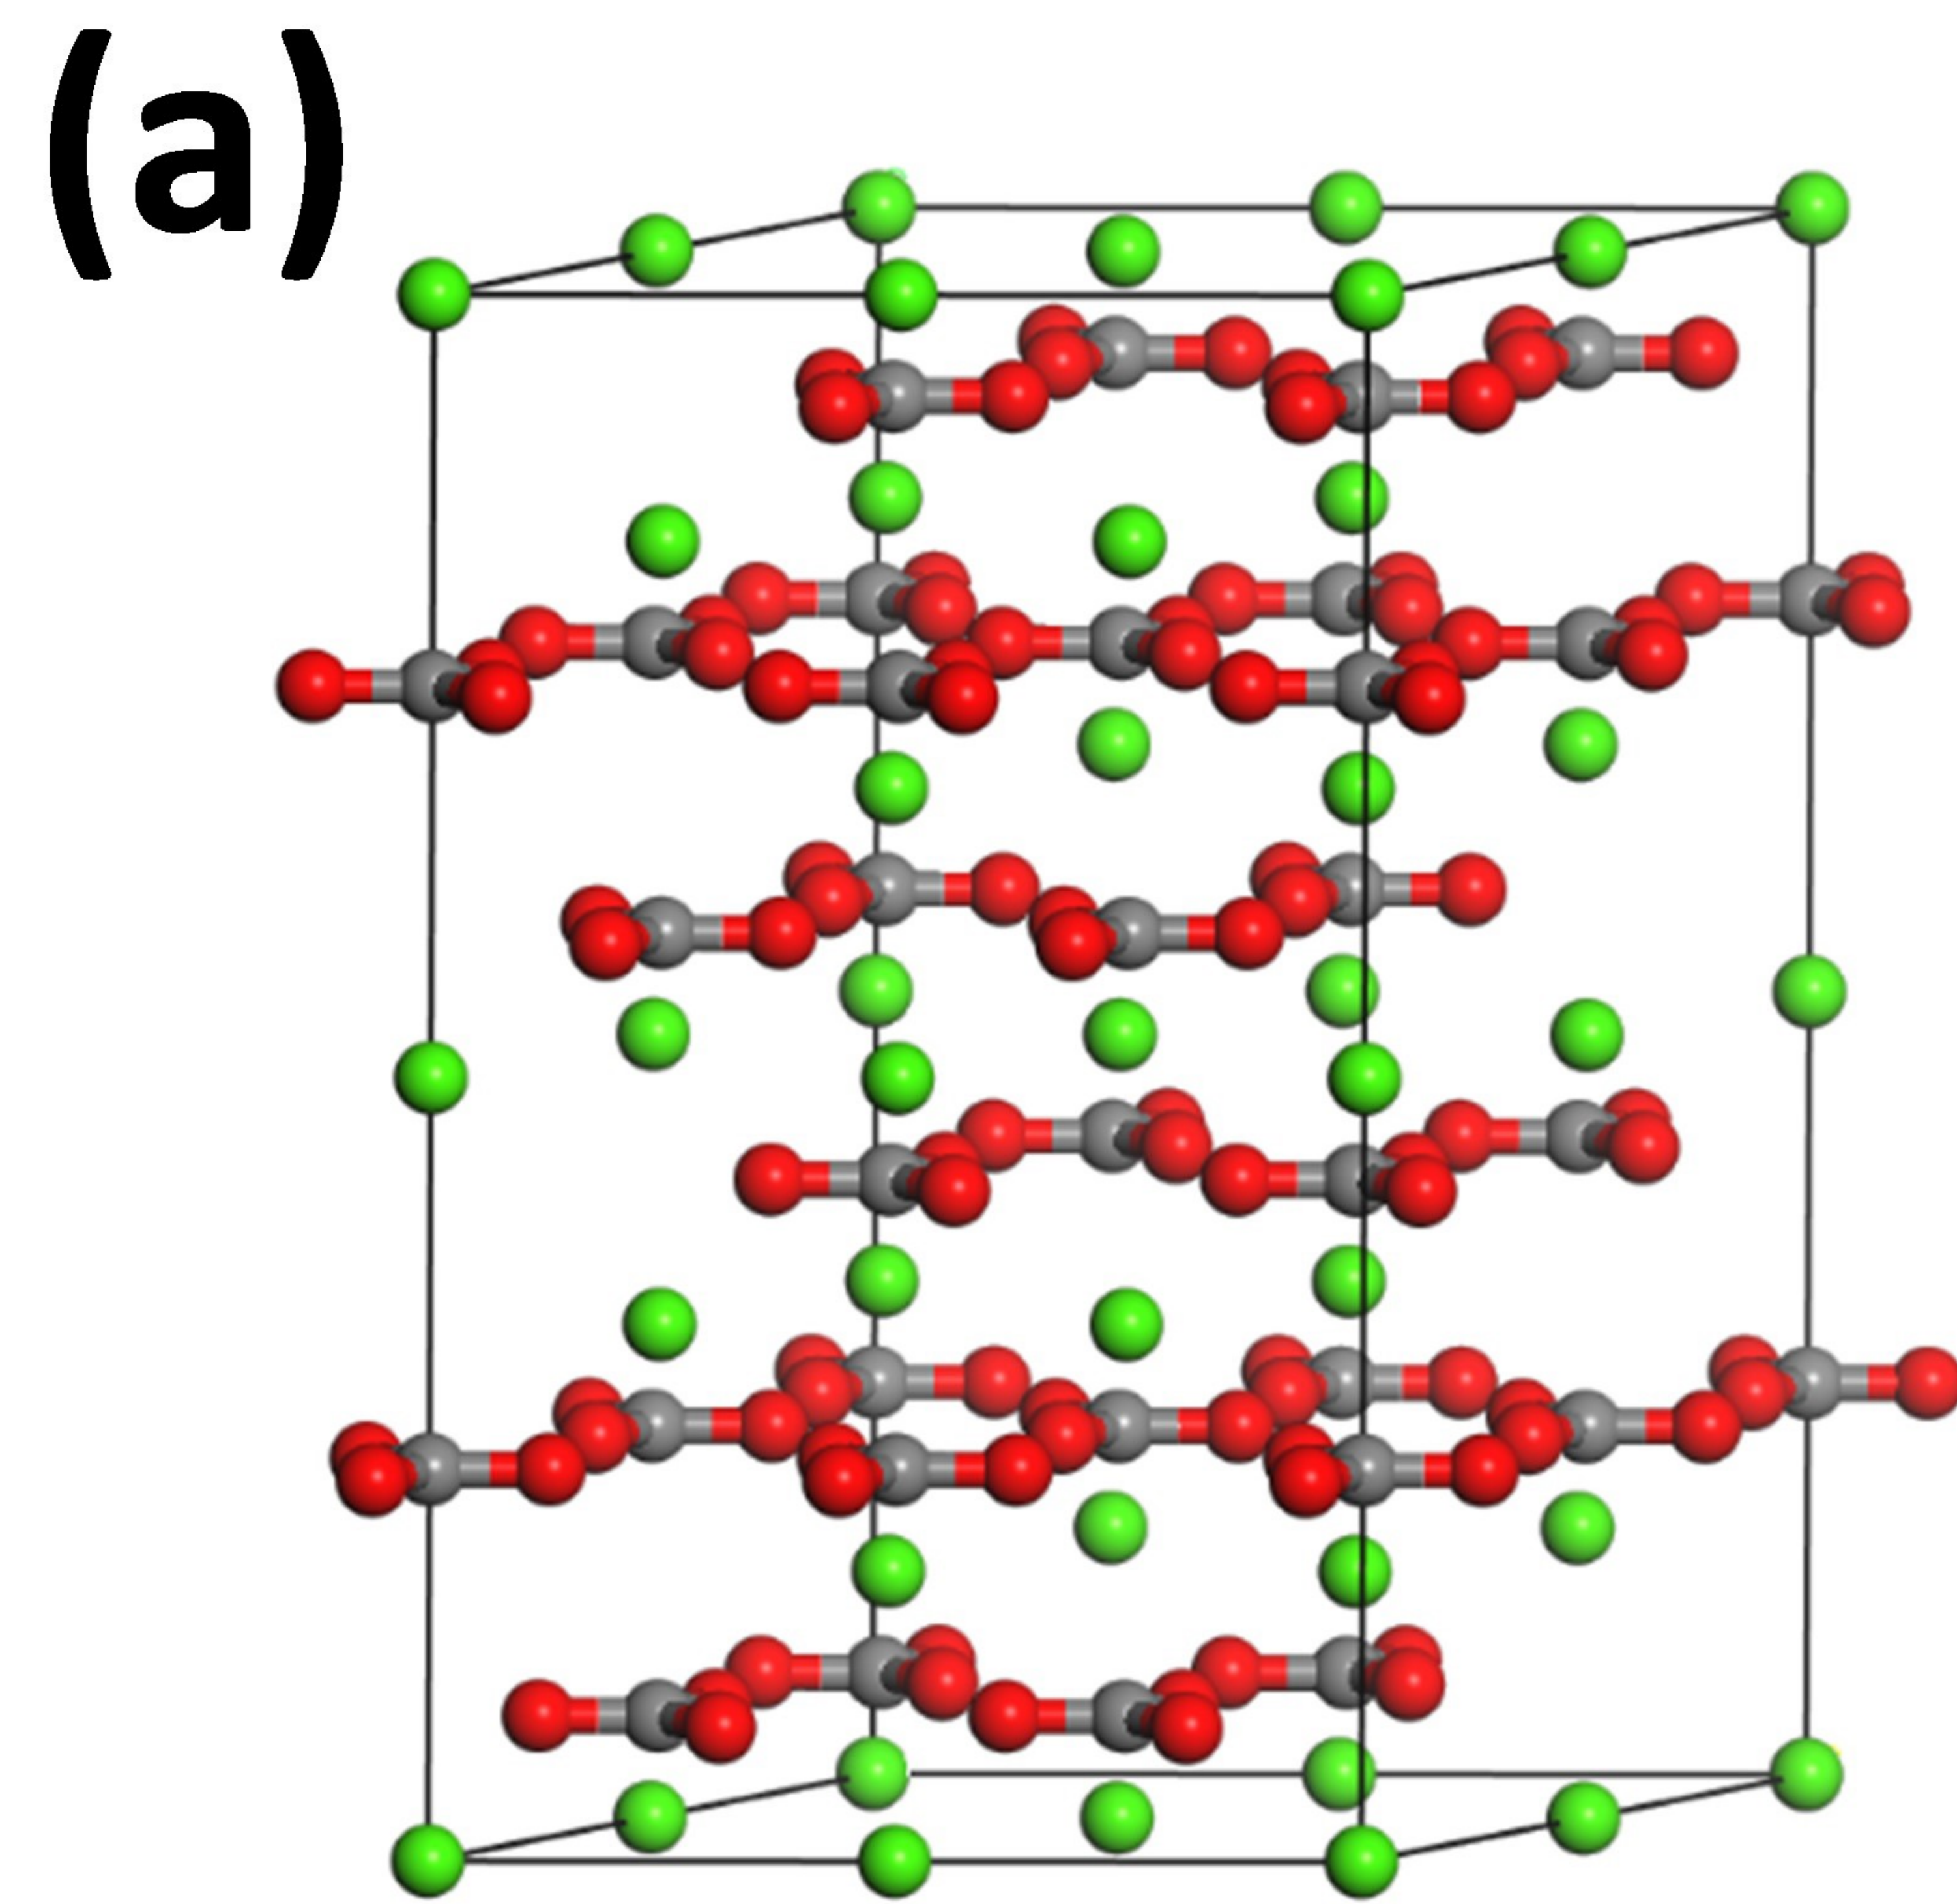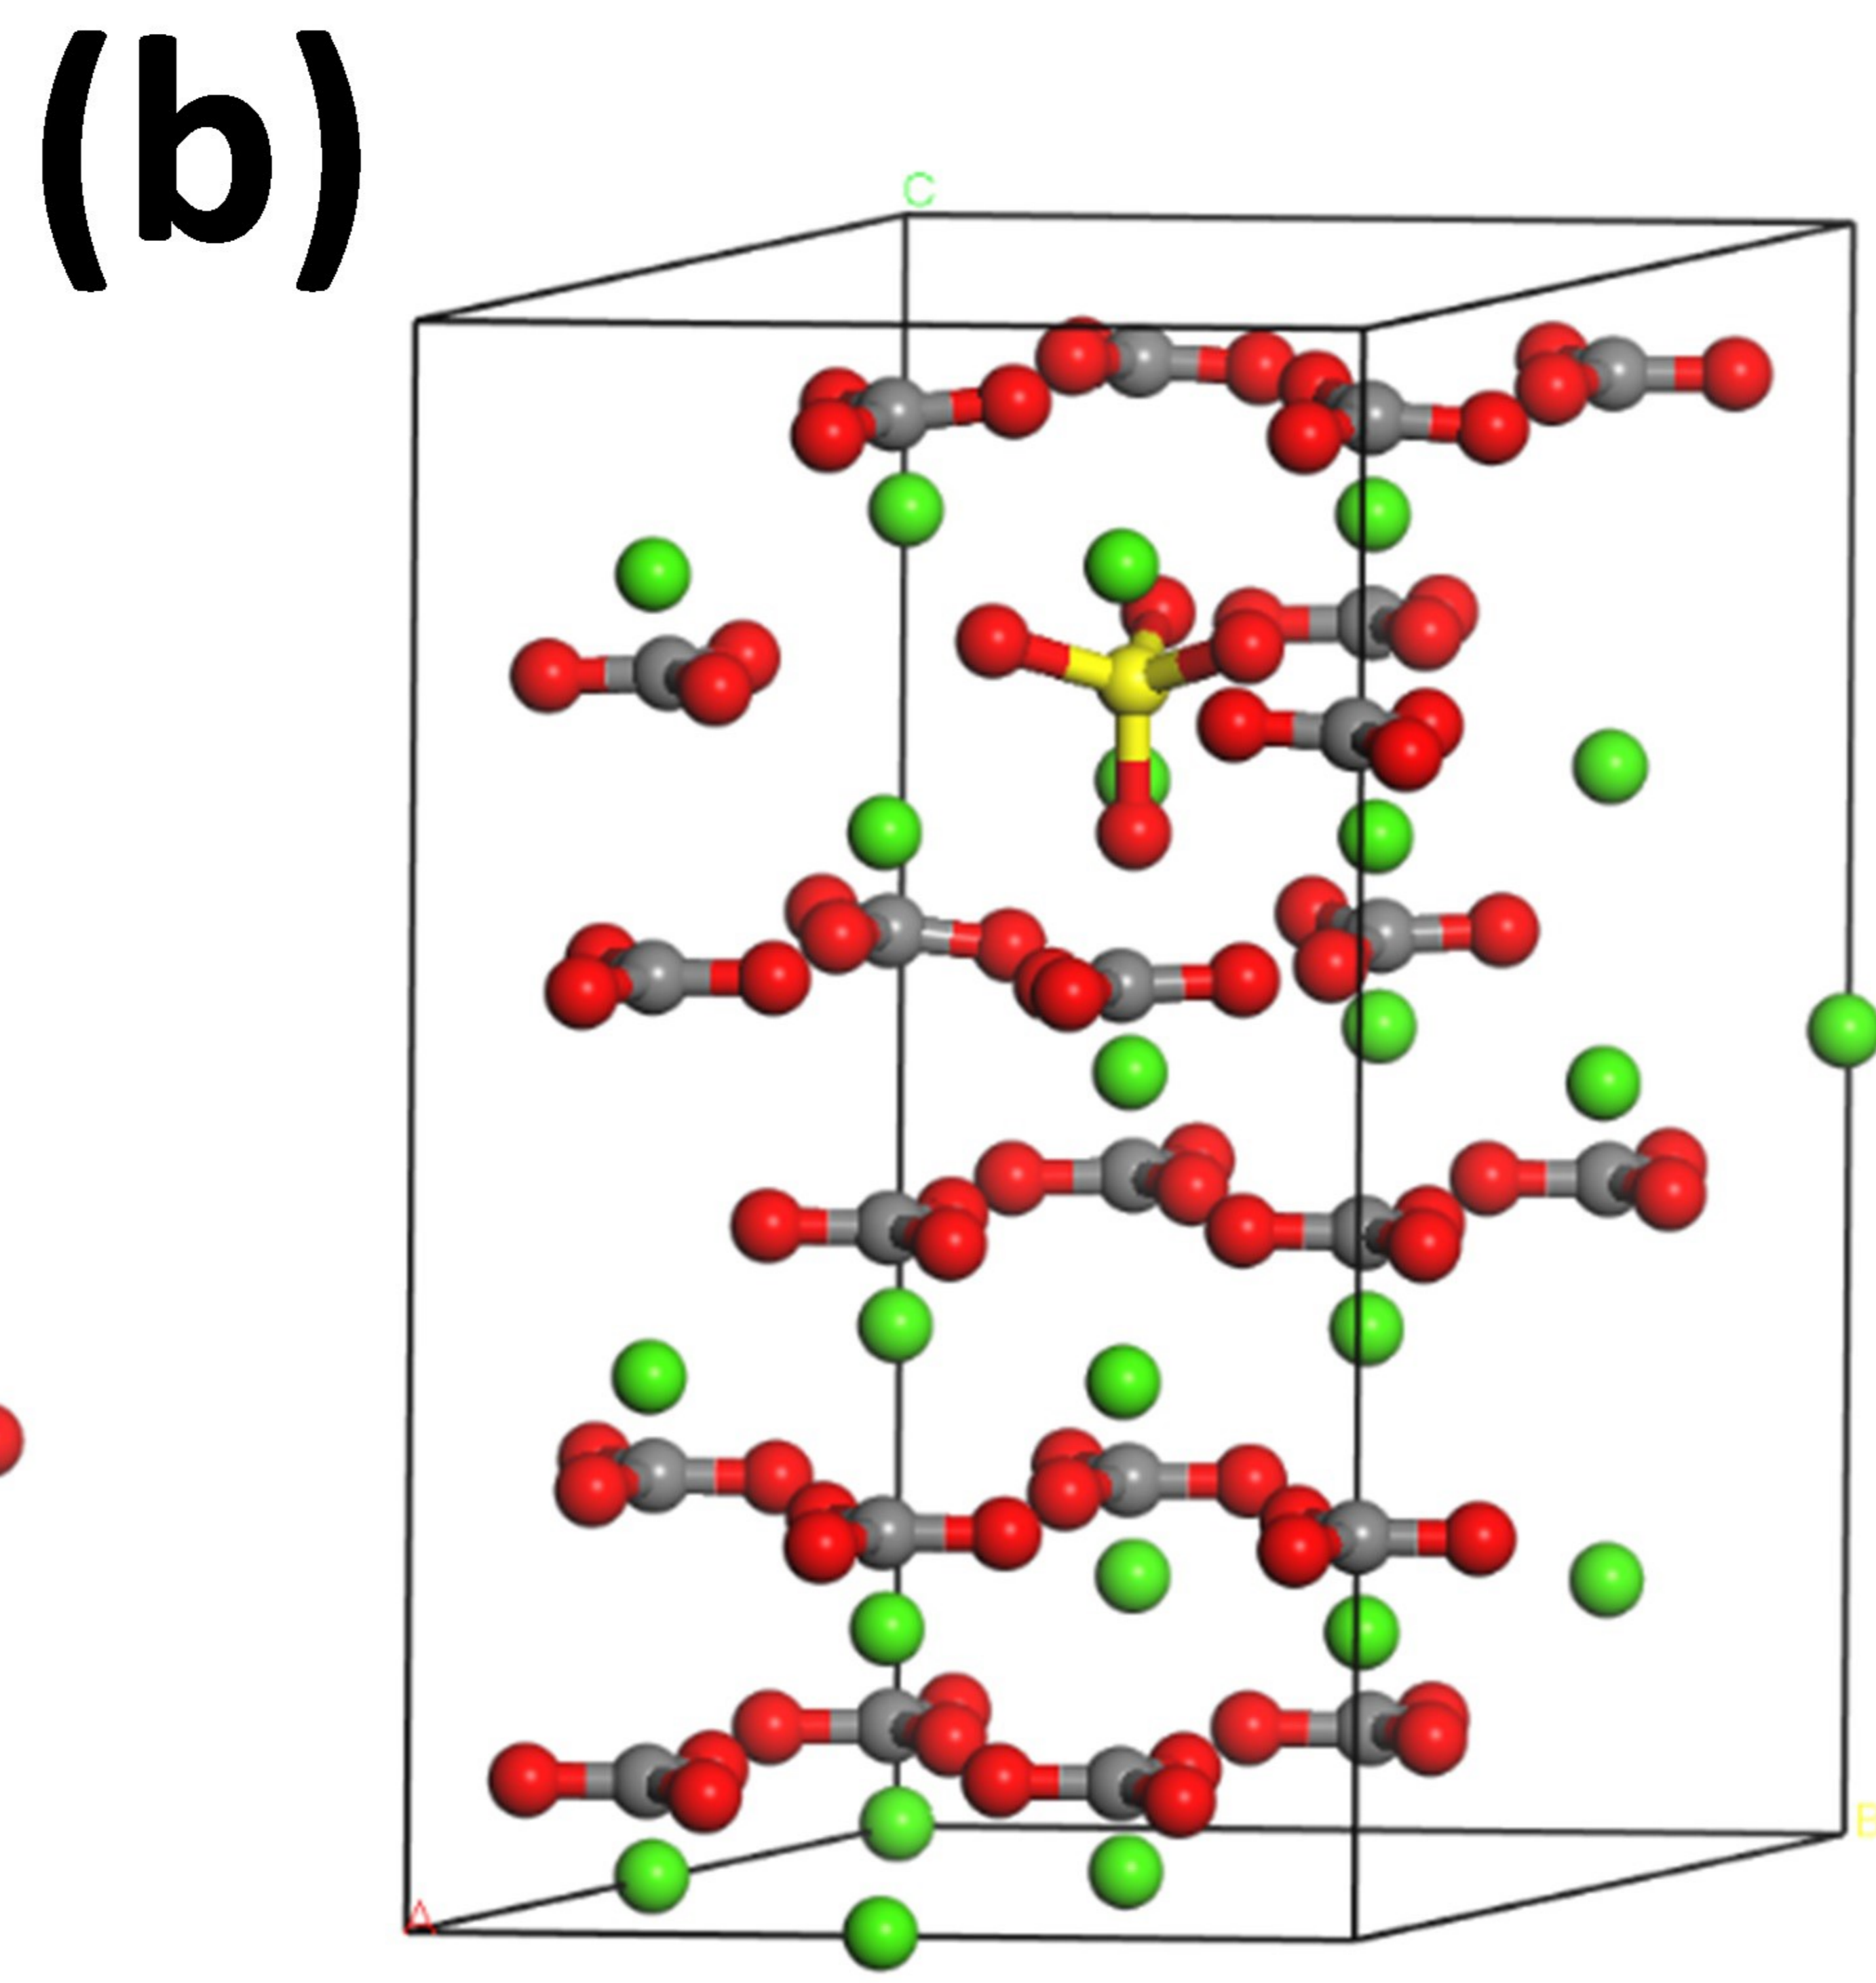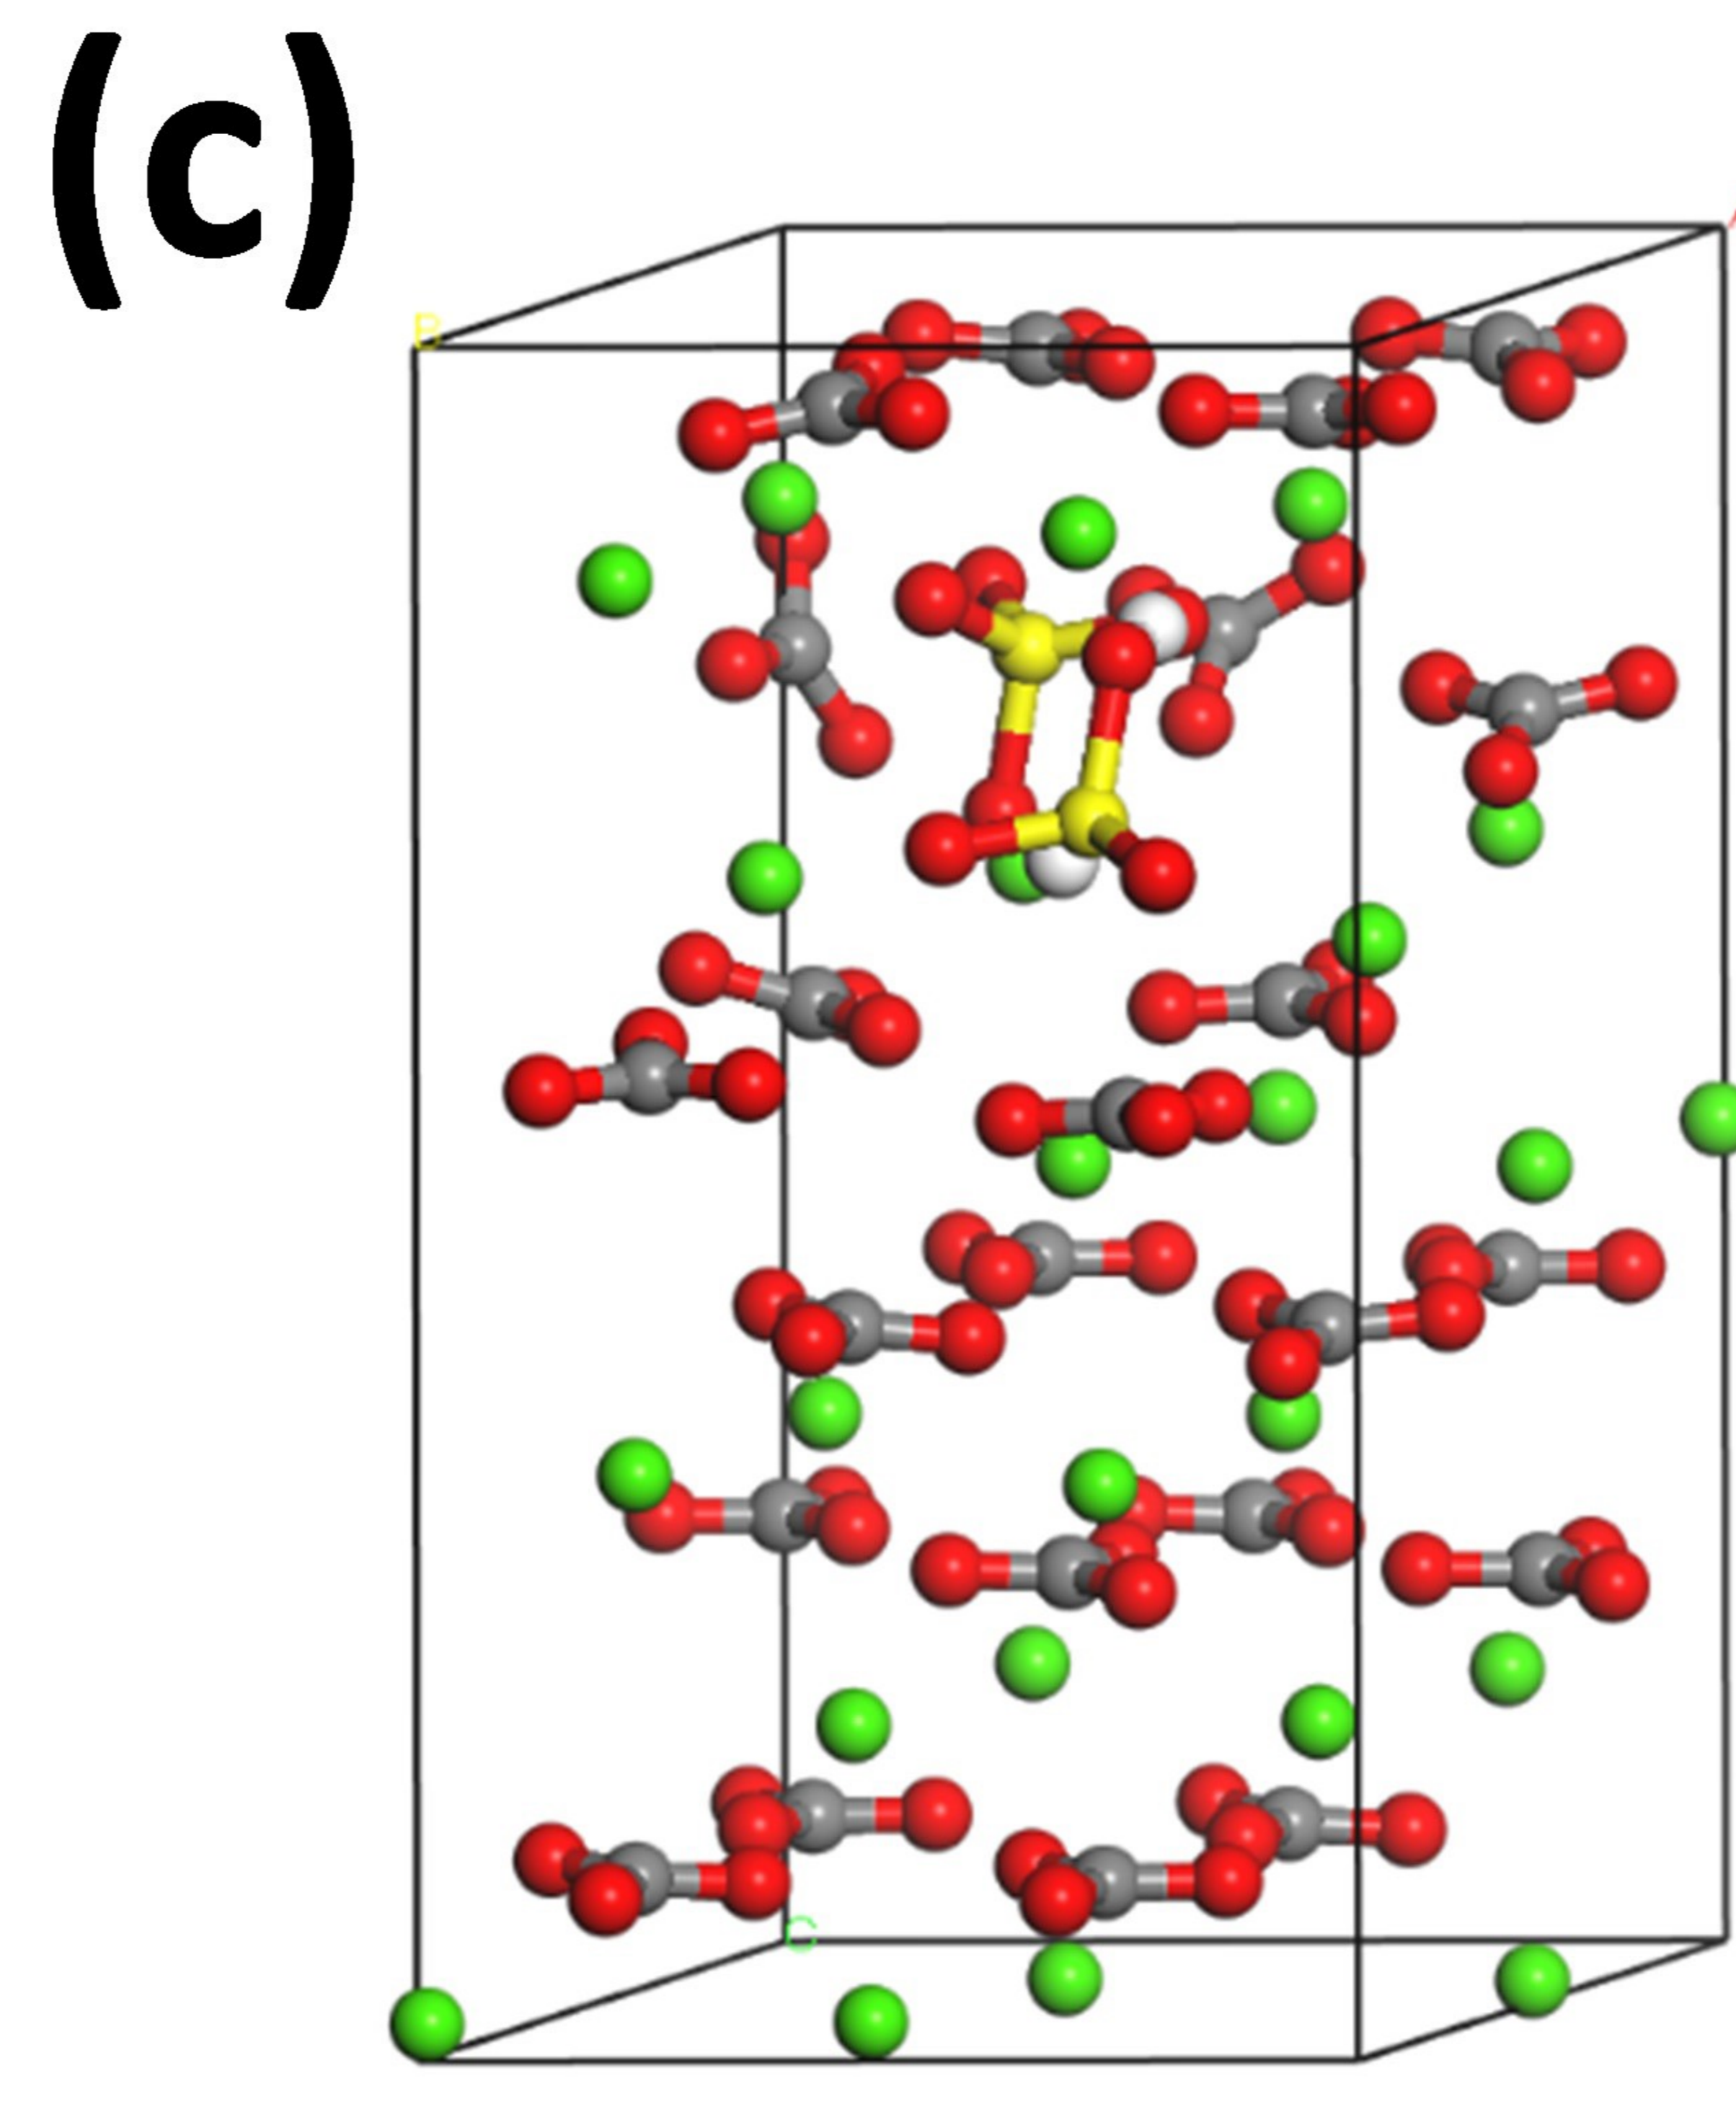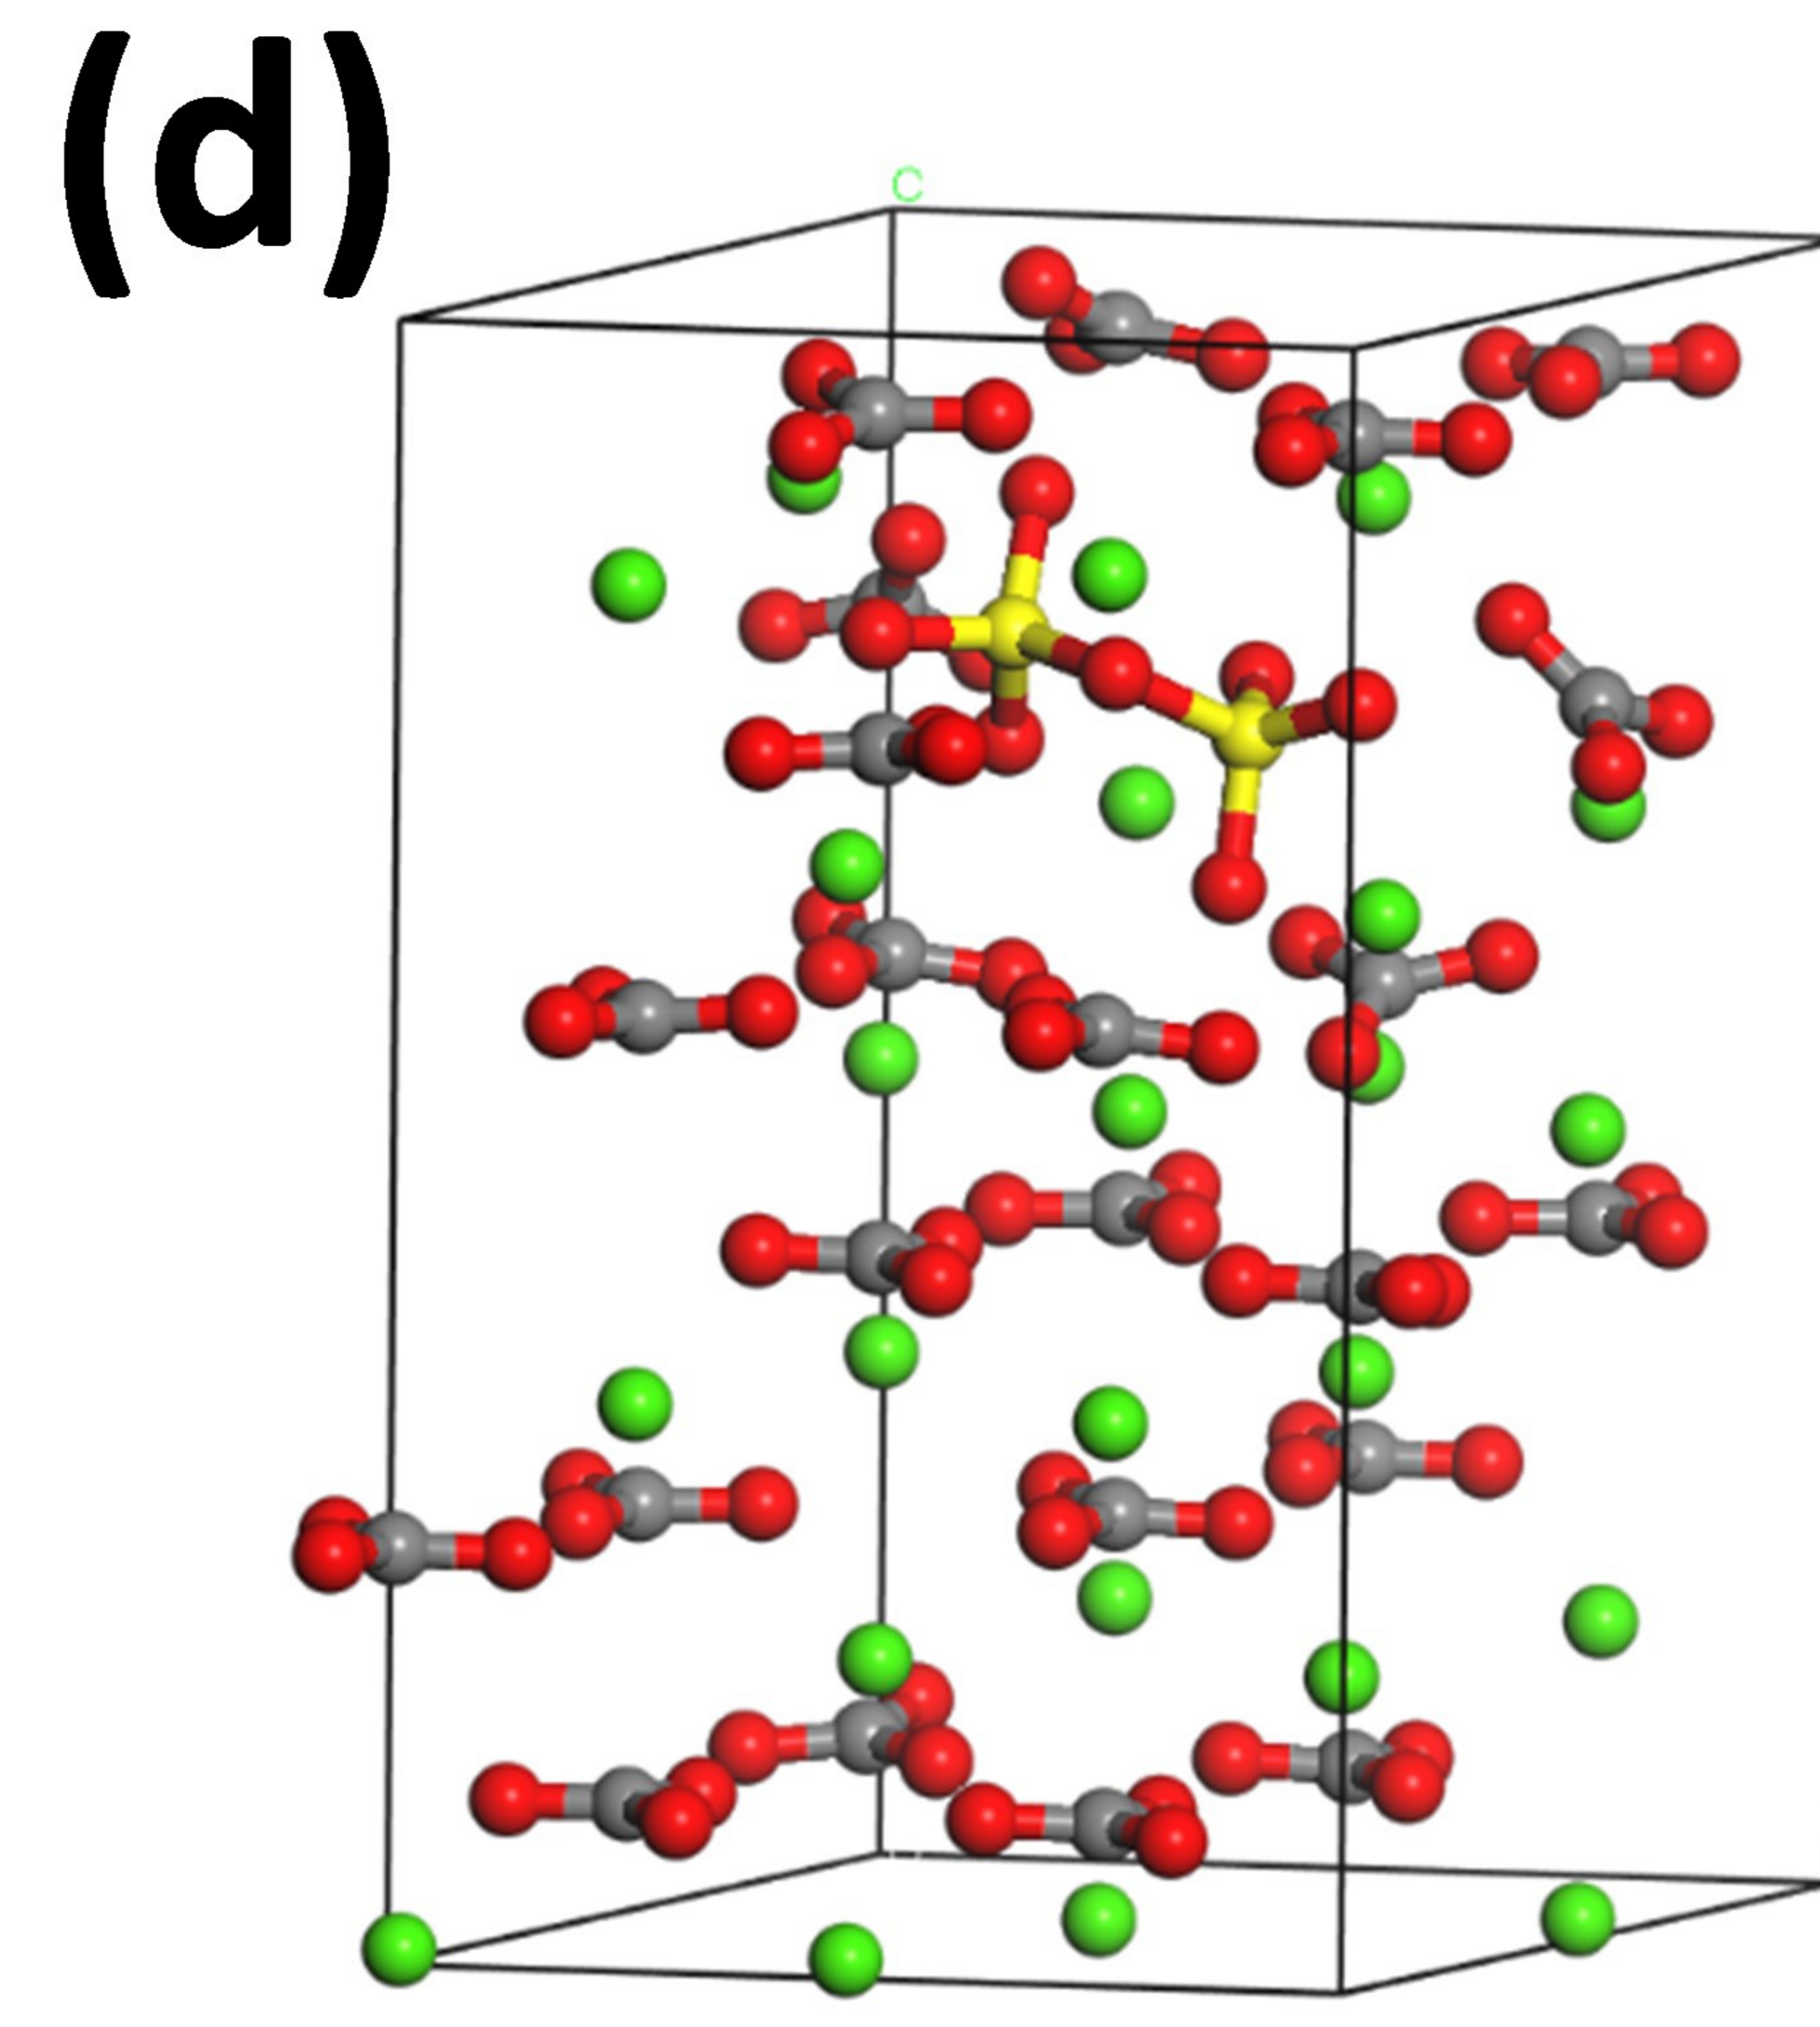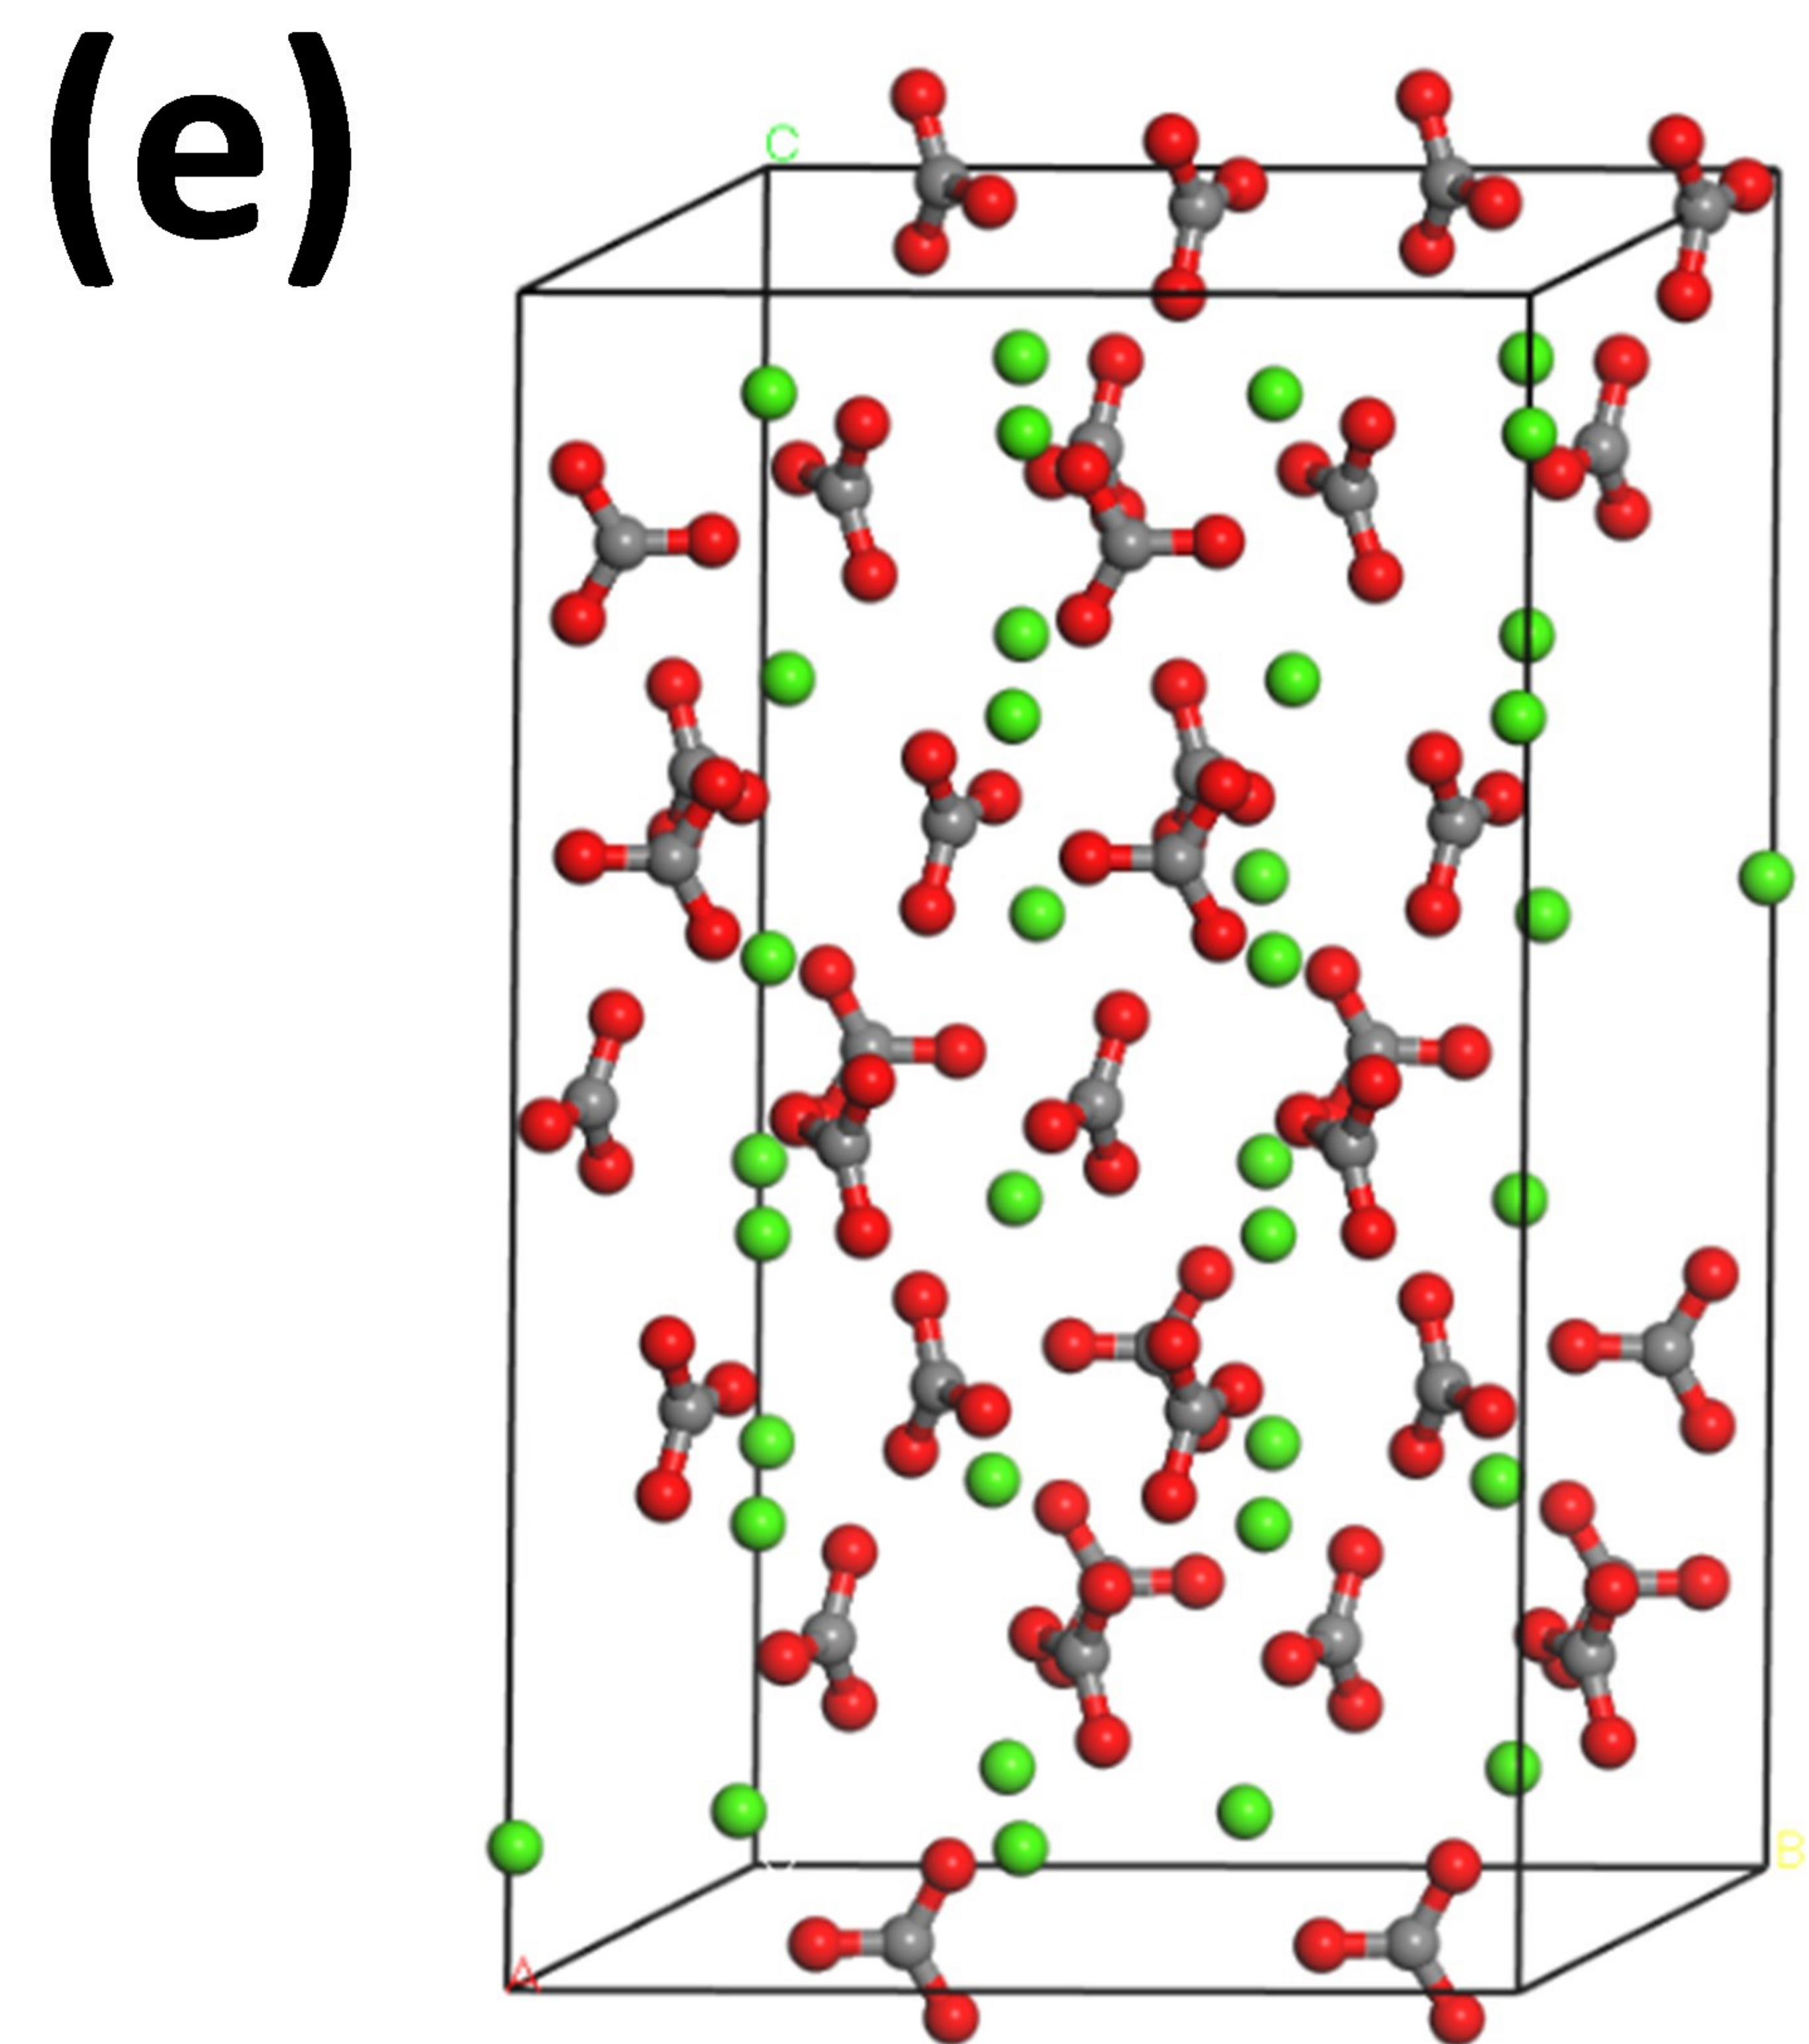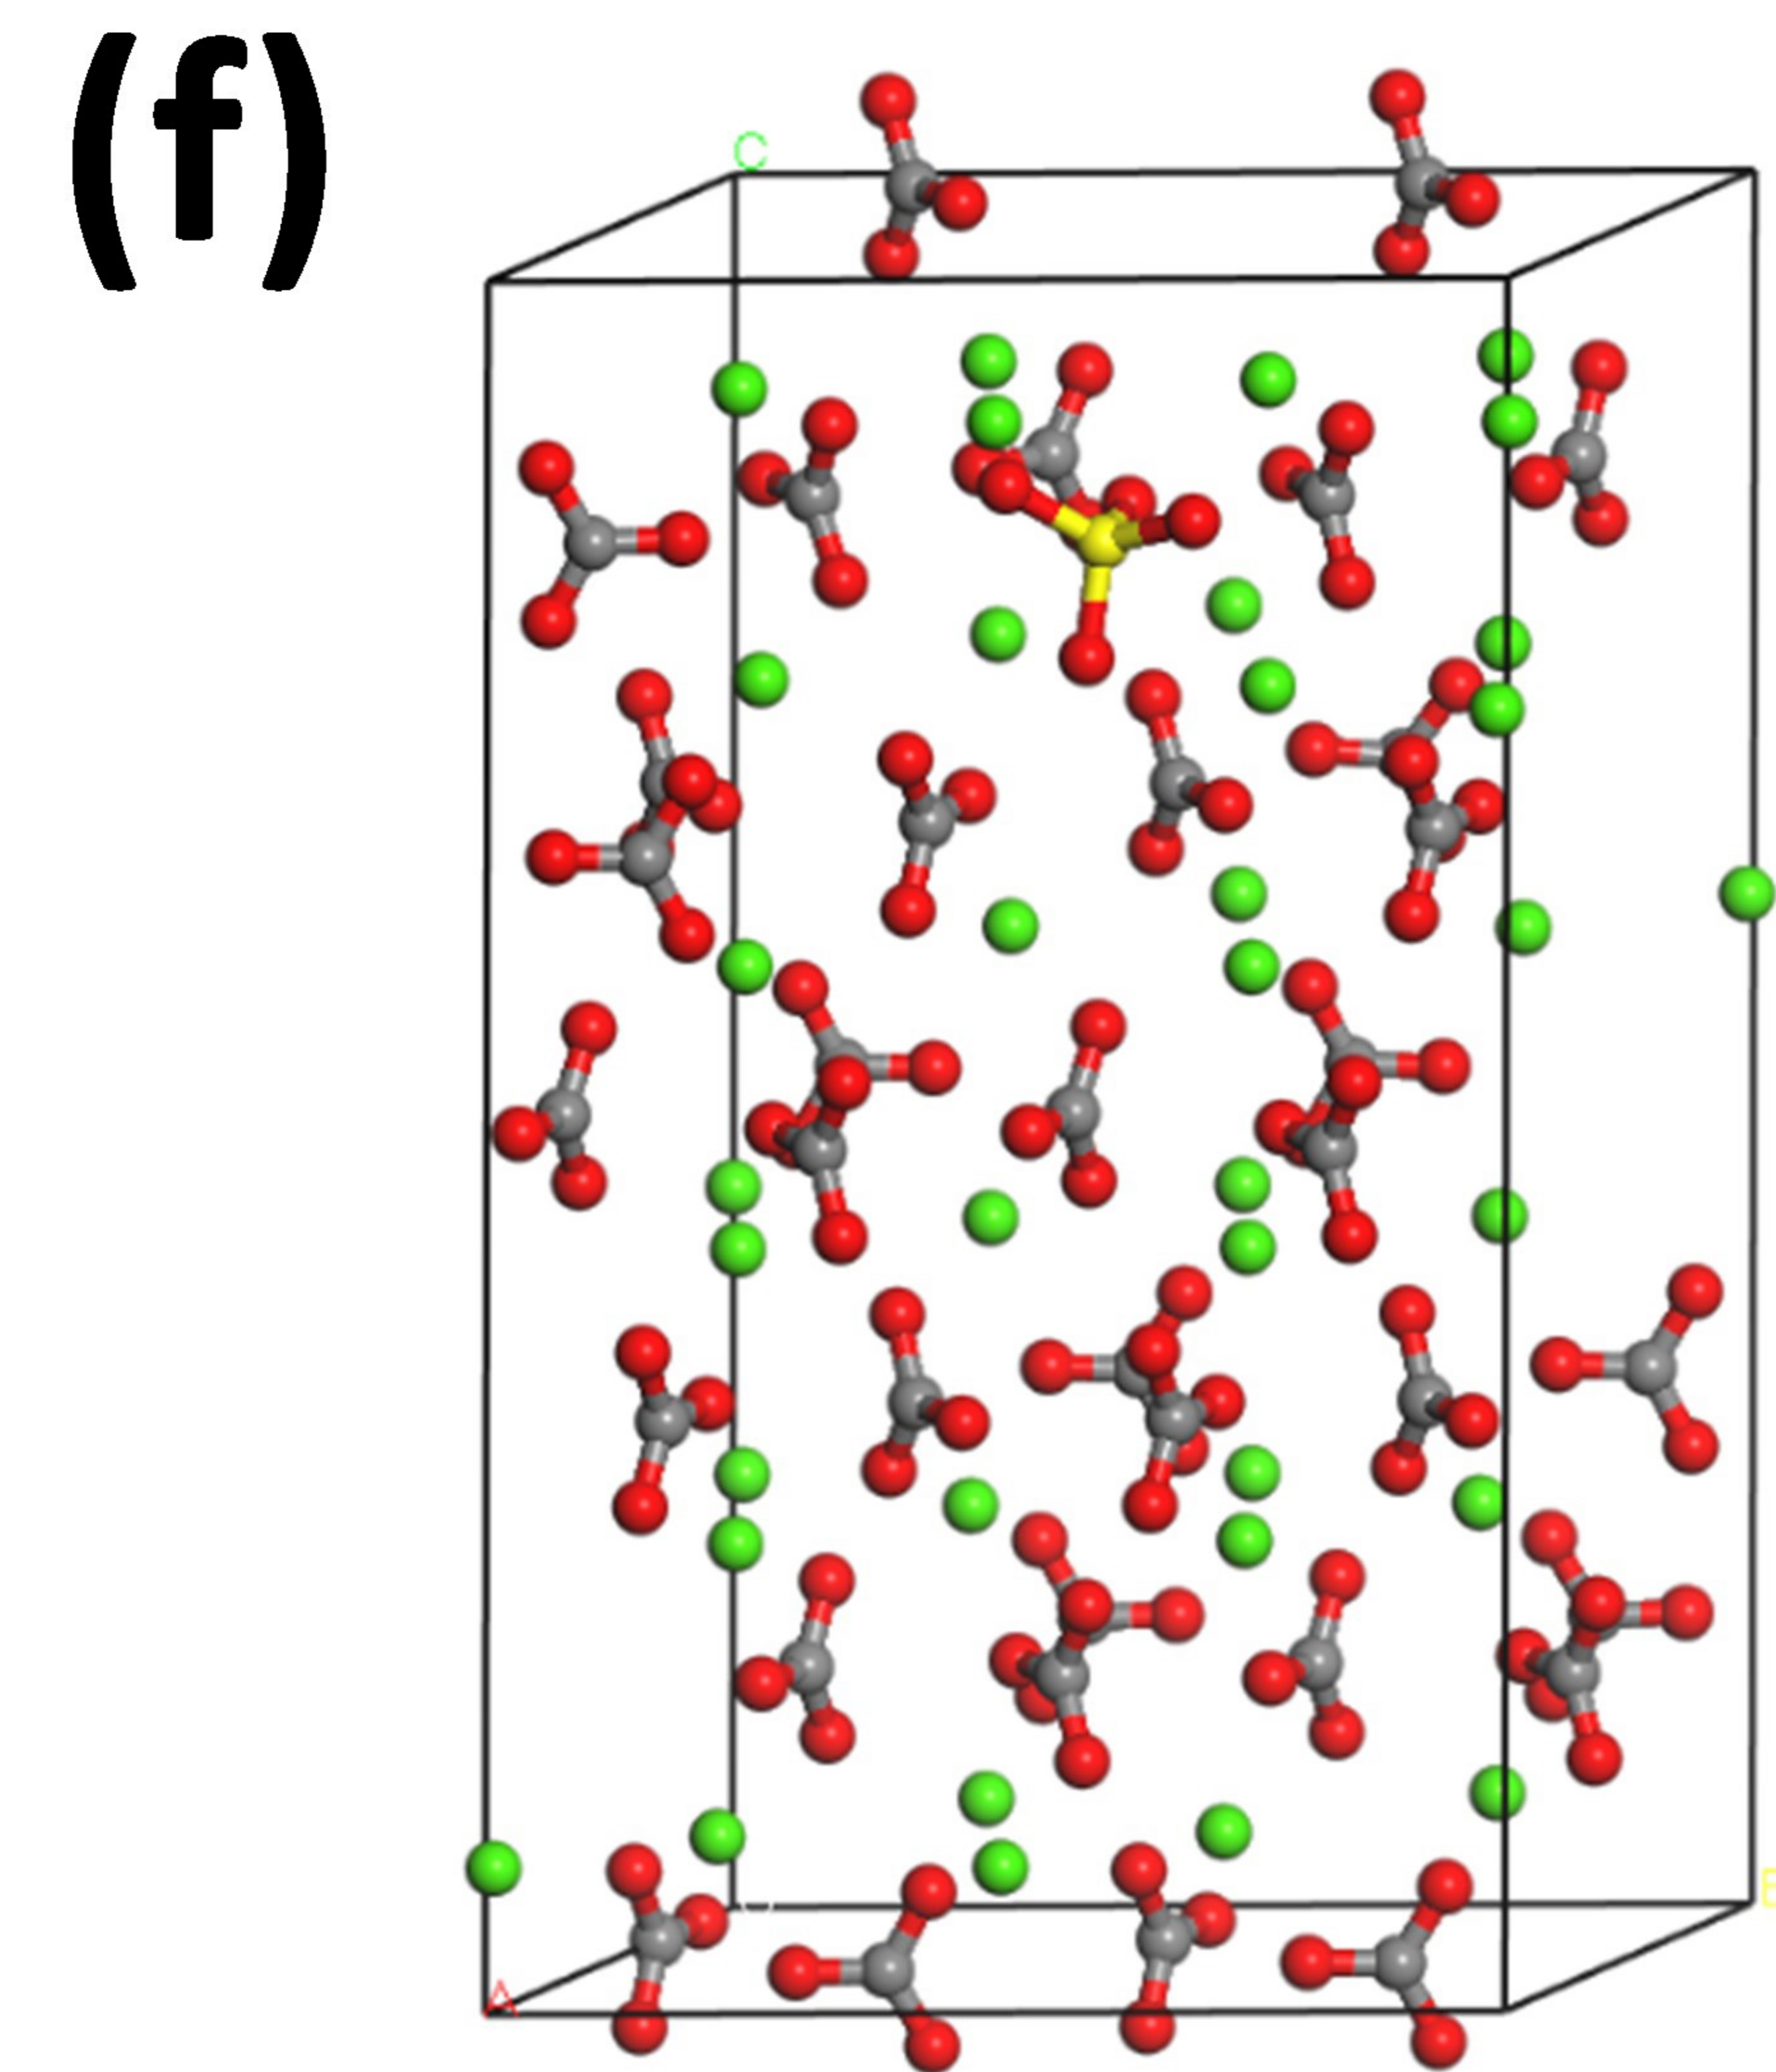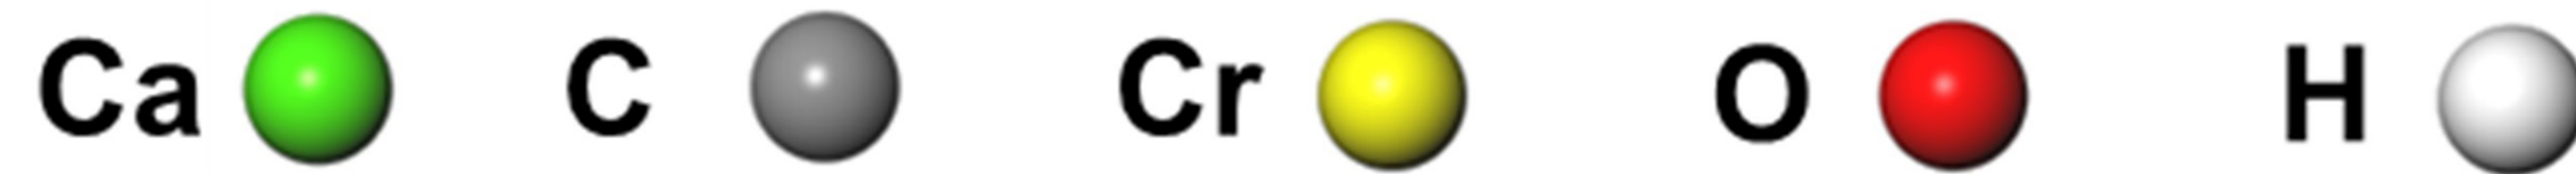

Supplement: d2en00040g3.pdf [file d2en00040g3.pdf]

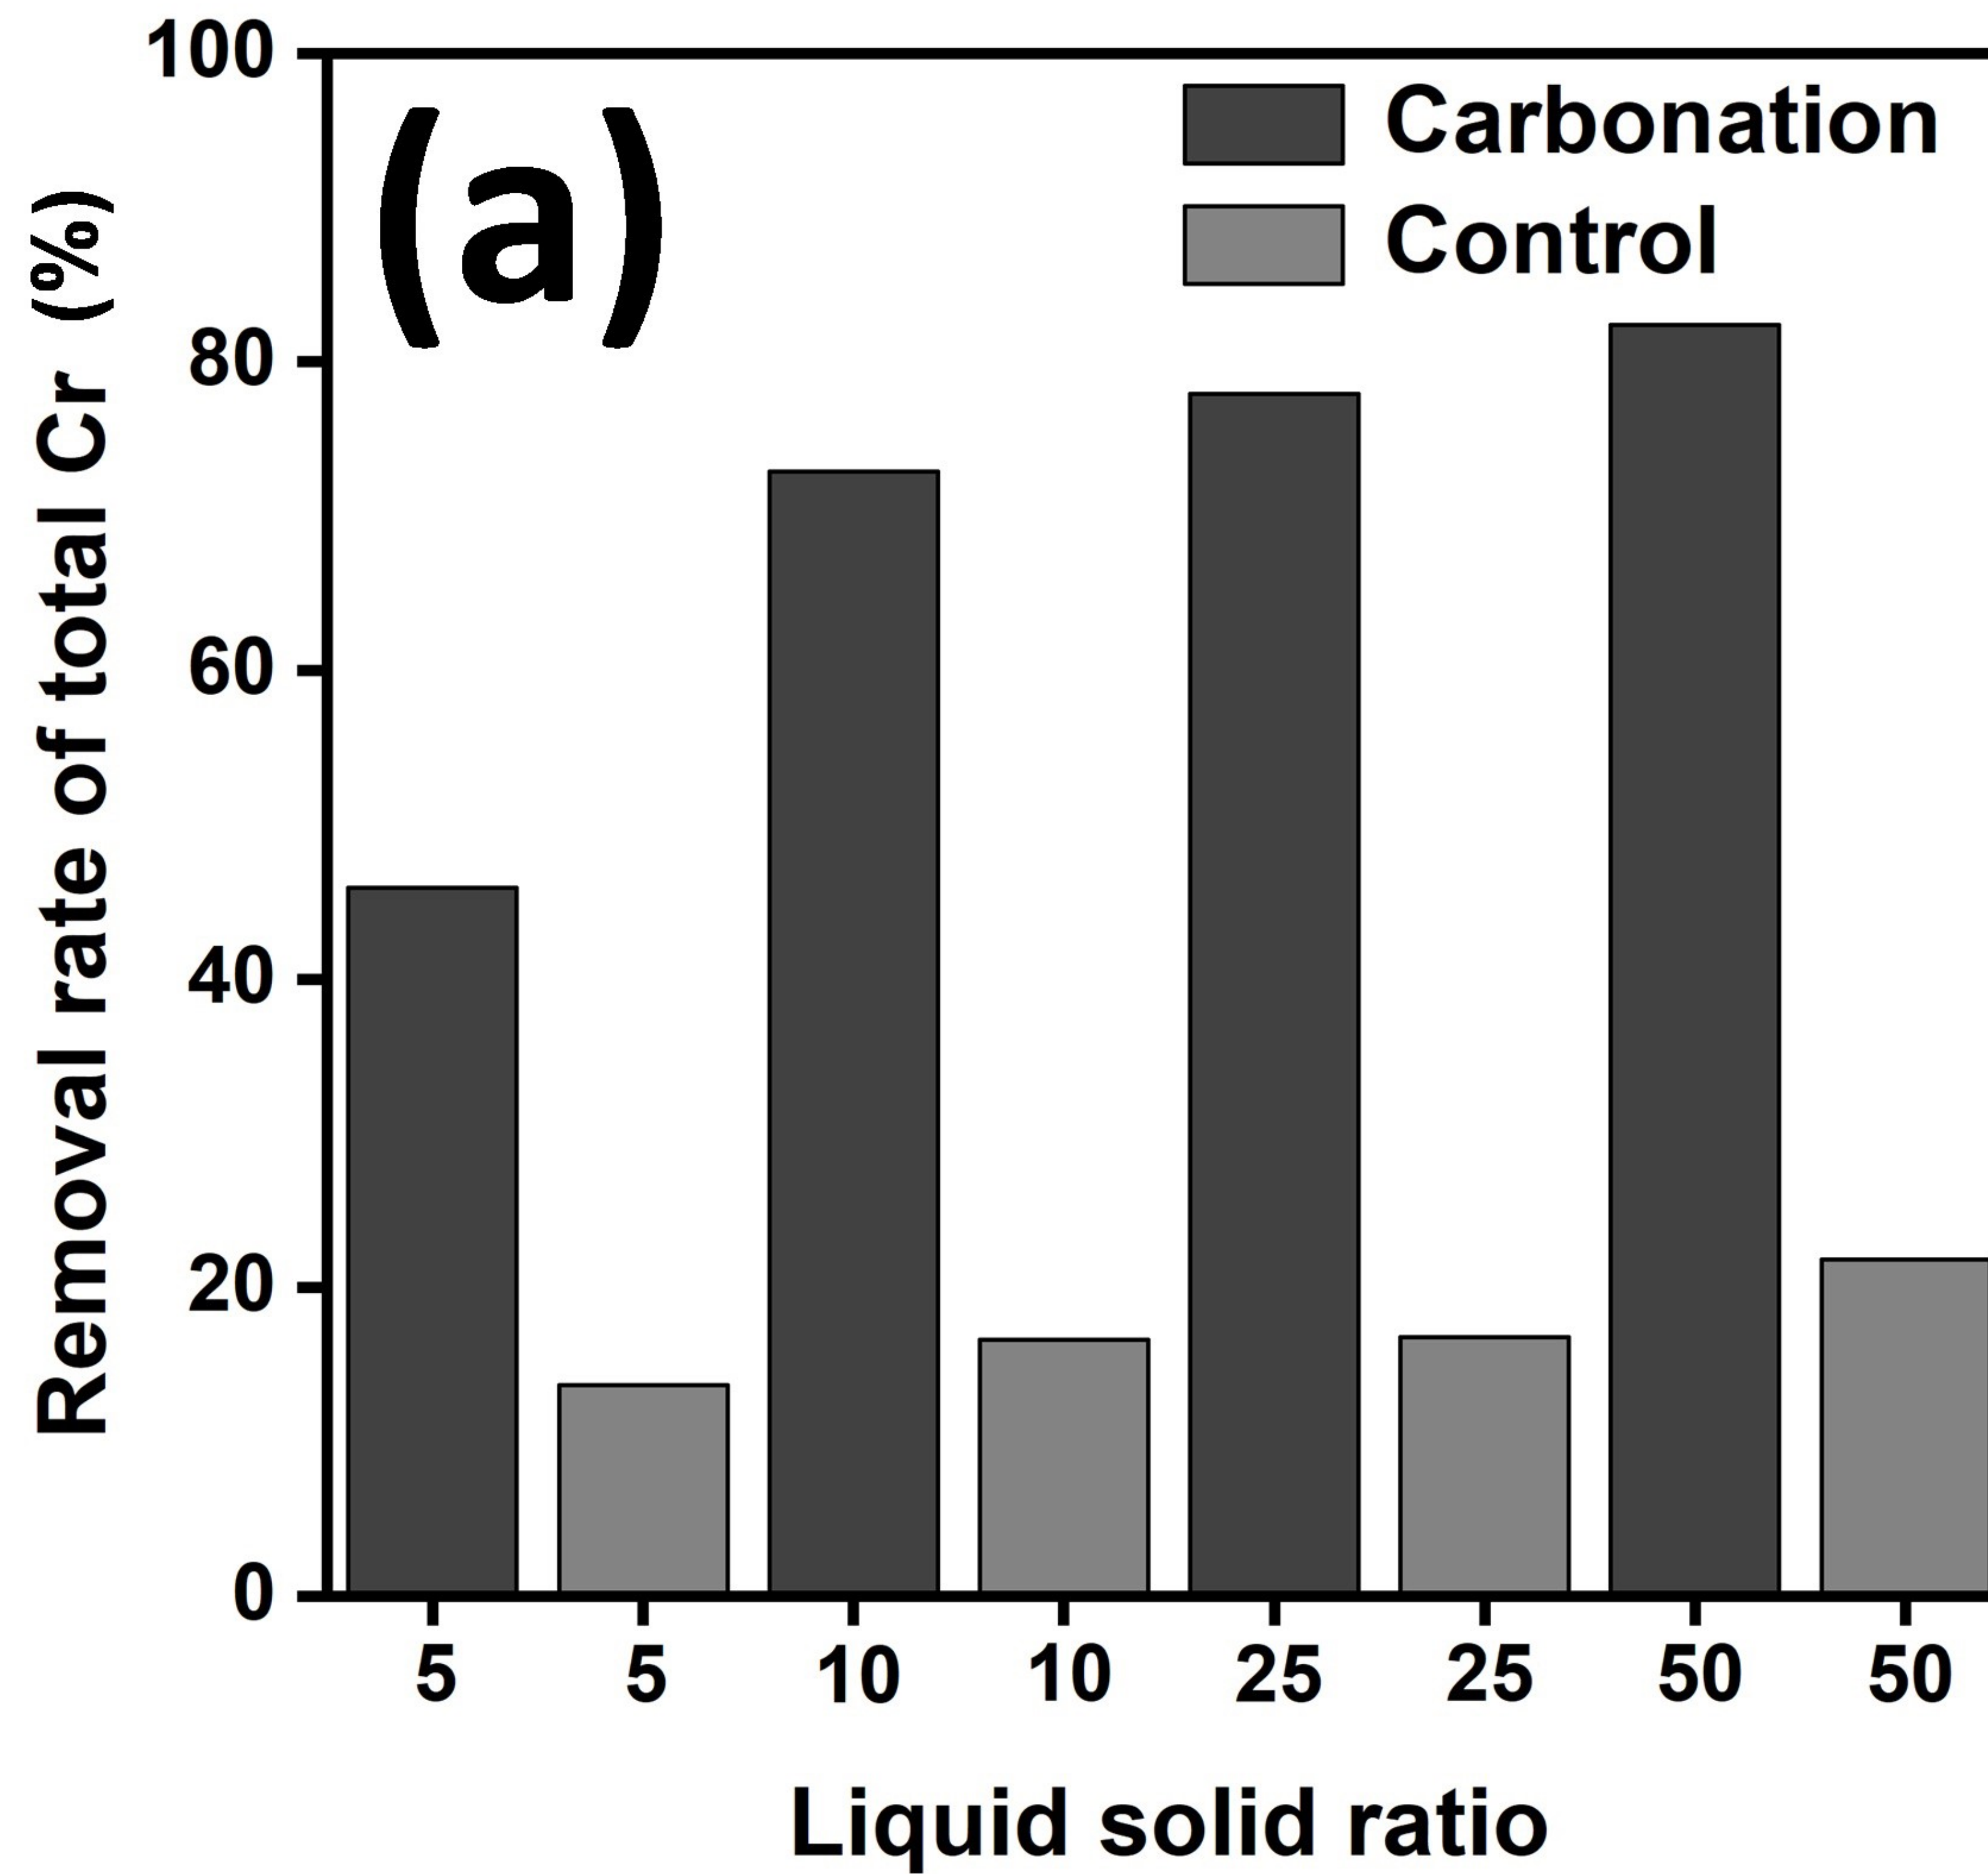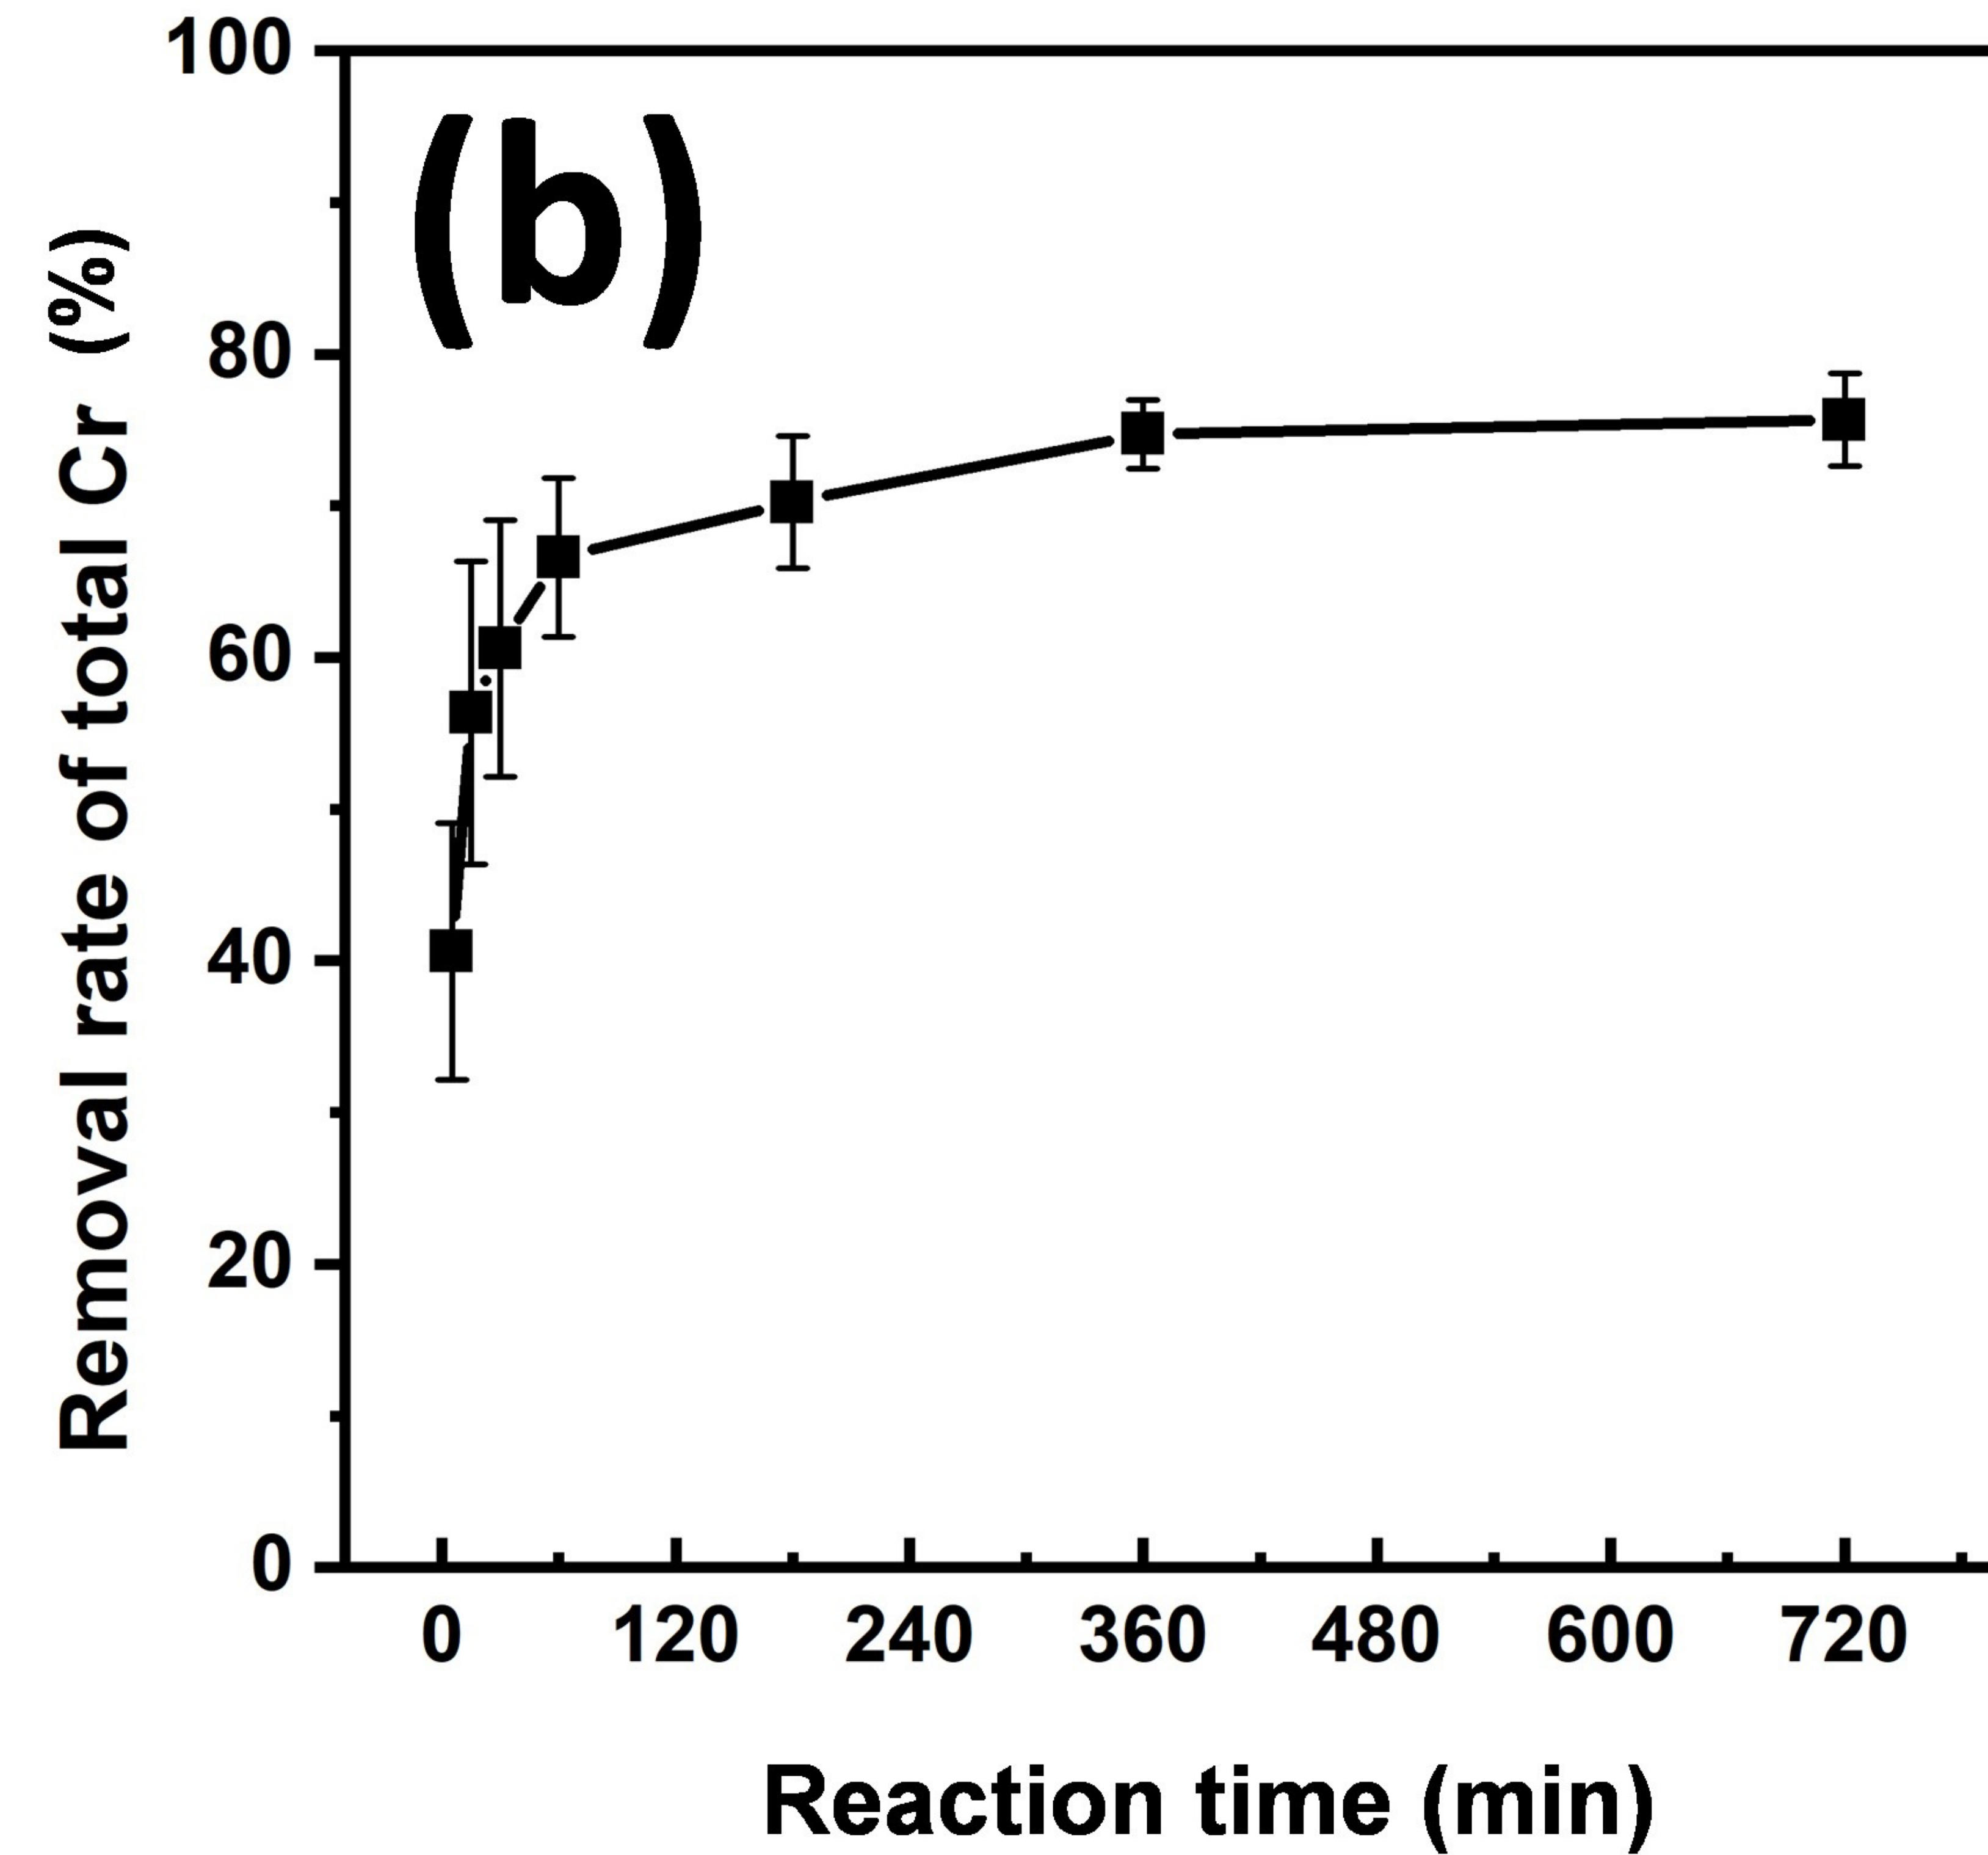

Supplement: d2en00040g4.pdf [file d2en00040g4.pdf]

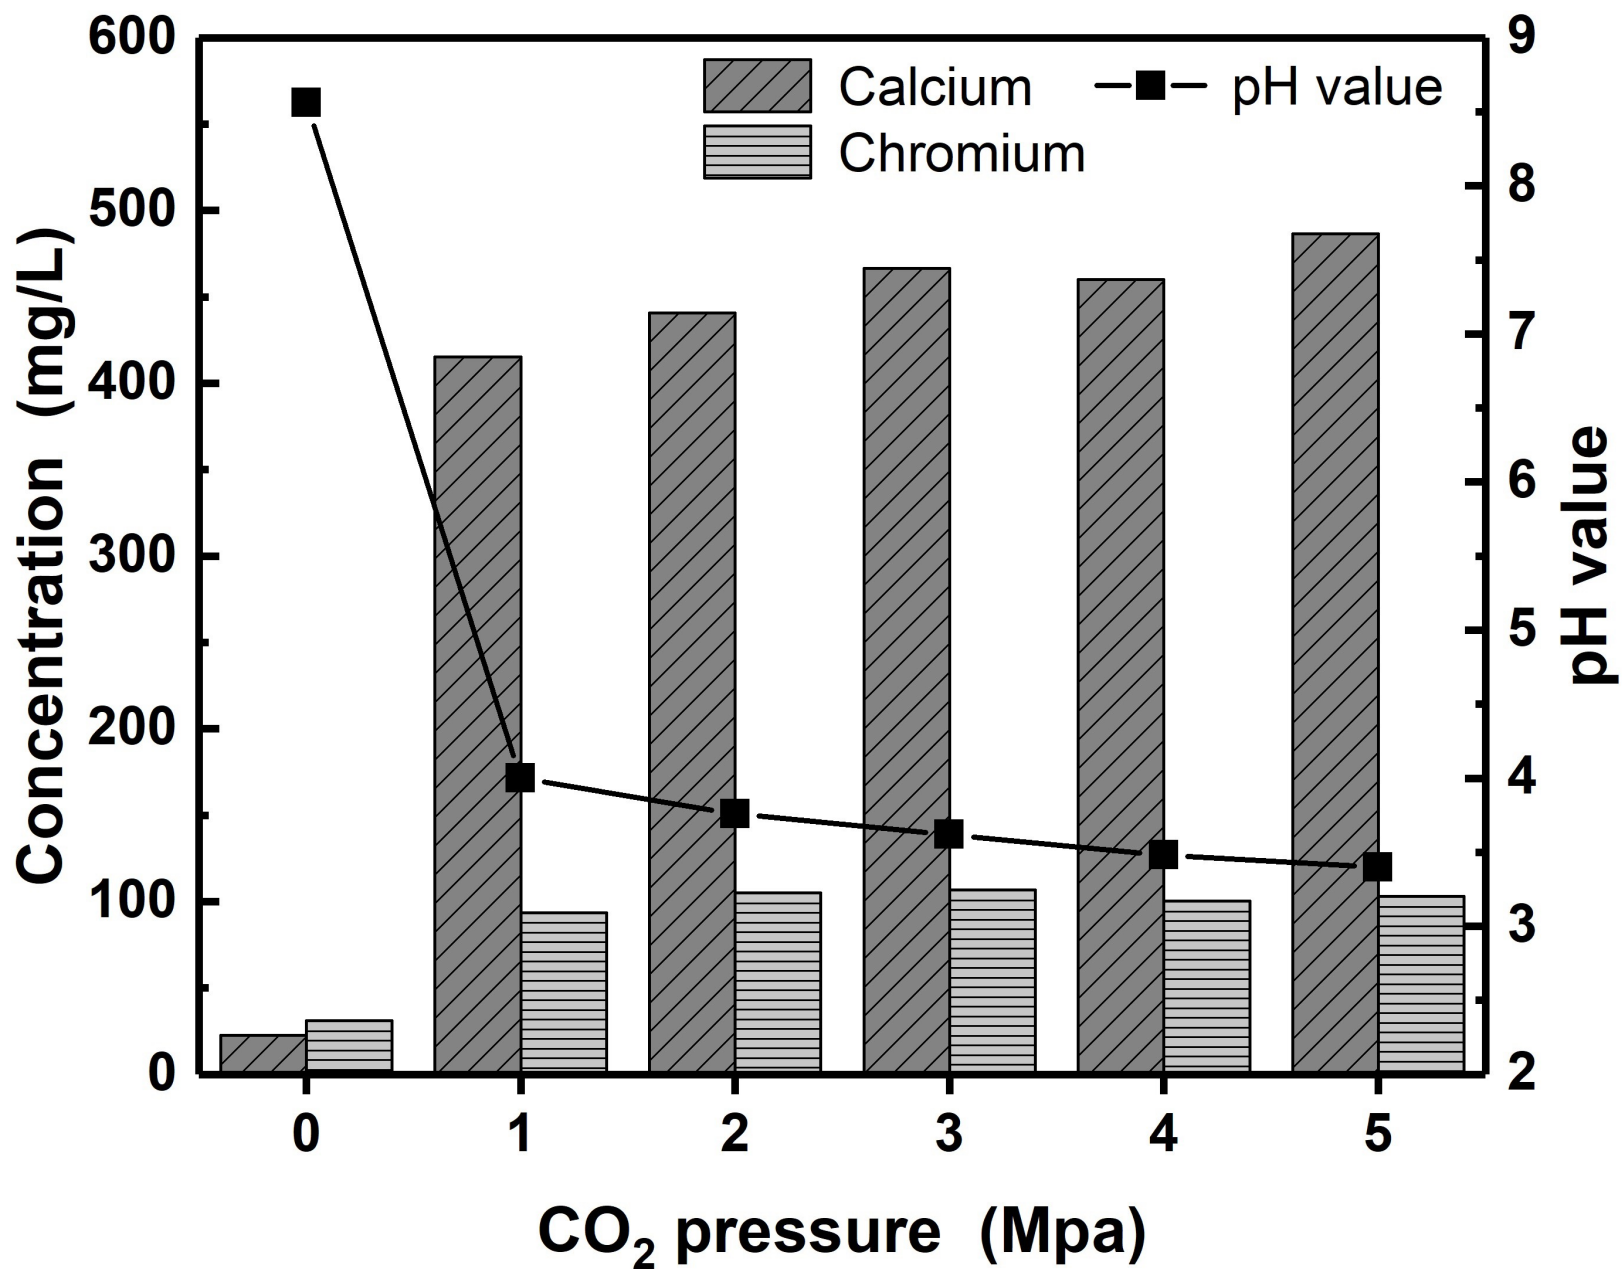

Supplement: d2en00040g5.pdf [file d2en00040g5.pdf]

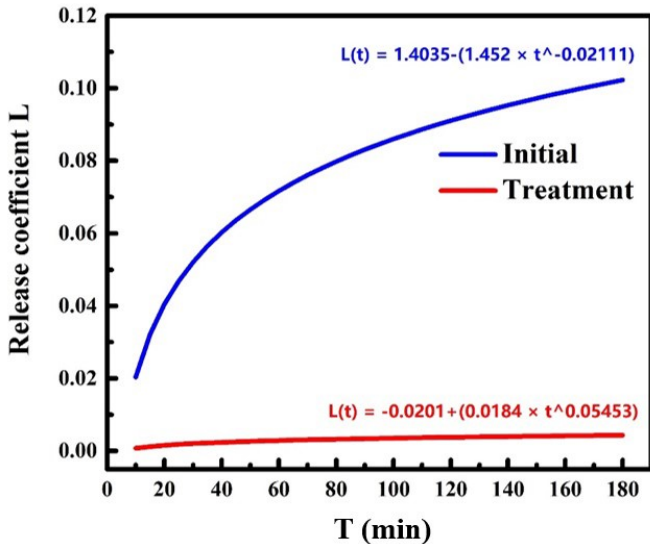

Supplement: d2en00040g6.pdf [file d2en00040g6.pdf]

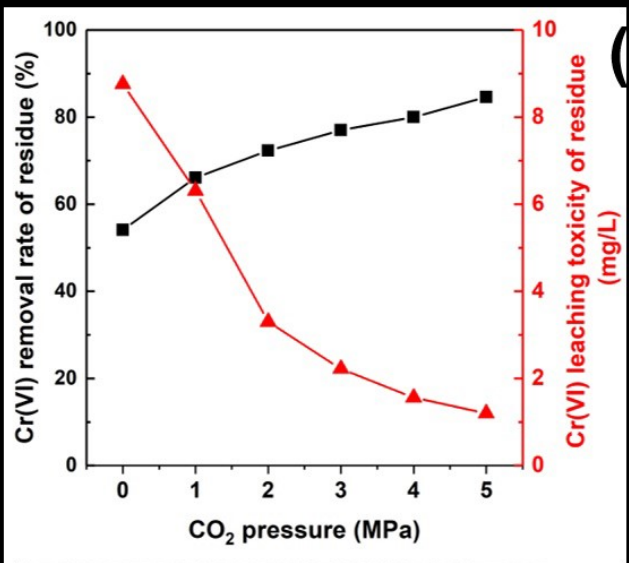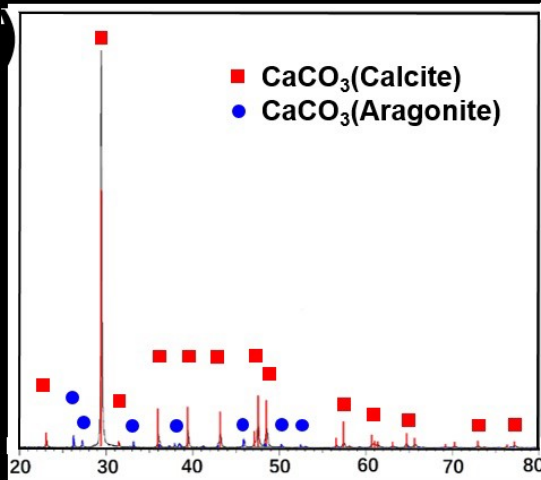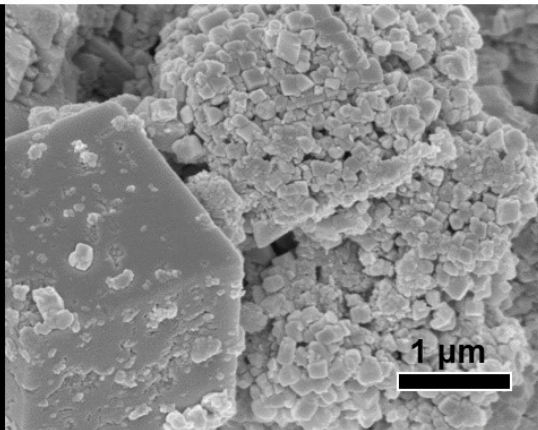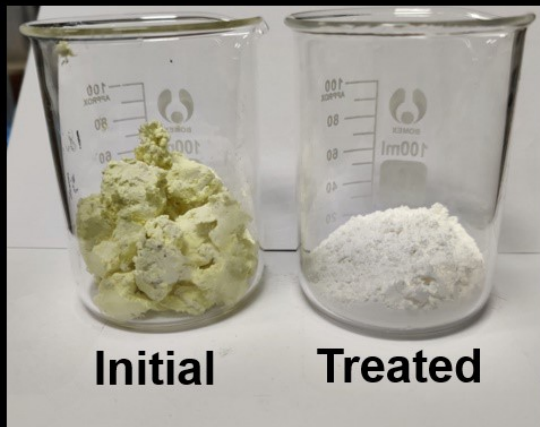

Supplement: d2en00040g7.pdf [file d2en00040g7.pdf]
